# Supplementary material
Source: PubMed Central journal article supplement (PMC7993020)
Supplement: YSCM_A_1863738_SM4003.pdf [file YSCM_A_1863738_SM4003.pdf]

**CERTIFICATION REGARDING CONFLICTS OF INTEREST AND CONFIDENTIALITY OF INFORMATION**

Each Covered Person agrees to comply with the provisions of these Policies so long as he/she is a Covered Person. By signing, you are confirming that you have read and understand the above Policy on Conflicts of Interest and Confidentiality and agree to abide by same during all times that you are a Covered Person, as defined in the Policy.

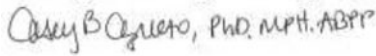

**Casey B. Azuero, PhD, MPH, ABPP**



**Charles H. Bombardier, PhD, ABPP**



**Jesse R. Fann, MD, MPH**

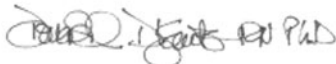

**Donald D. Kautz, RN, PhD**

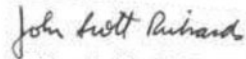

**J. Scott Richards, PhD, ABPP**



**Sunil Sabharwal, MD**

**CERTIFICATION REGARDING CONSORTIUM POLICIES AND PROCEDURES**

Each Covered Person agrees to comply with the provisions of the policies and procedures outlined in the Clinical Practice Guideline Orientation Manual so long as he/she is a Covered Person. By signing, you are confirming that you have read and understand the Clinical Practice Guidelines Orientation Manual Policies and Procedures and agree to abide by same during all times that you are a Covered Person.

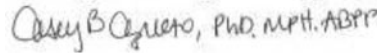

**Casey B. Azuero, PhD, MPH, ABPP**



**Charles H. Bombardier, PhD, ABPP**



**Jesse R. Fann, MD, MPH**



**Donald D. Kautz, RN, PhD**

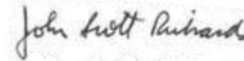

**J. Scott Richards, PhD, ABPP**



**Sunil Sabharwal, MD**

## Appendix A: Search Strategies

### Ovid MEDLINE® <1946 to August Week 2 2016>

1. exp Spinal Cord Injuries/
2. spinal cord injur\*.mp
3. (spine or spinal) and sci).mp
4. or/1-3
5. exp Mental Disorders/
6. (mental adj3 (health or disorder\*)).mp
7. (anxiety or depression or post-traumatic or posttraumatic or PTSD or bipolar or suicid\* or “self-harm”).ti,ab.
8. exp Substance-Related Disorders/
9. (drug\* or alcohol\* or illicit or substance) adj3 (use\* or abus\*).ti,ab.
10. or/5-9
11. 4 and 10
12. limit 11 to English language
13. limit 11 to abstracts
14. 12 or 13
15. limit 14 to humans

### Ovid MEDLINE® In-Process & Other Non-Indexed Citations <August 22, 2016>

1. spinal cord injur\*.mp
2. ((spine or spinal) and sci).mp
3. (mental adj3 (health or disorder\*)).mp
4. (anxiety or depression or post-traumatic or posttraumatic or PTSD or bipolar or suicid\* or “self-harm”).ti,ab.
5. ((drug\* or alcohol\* or illicit or substance) adj3 (use\* or abus\*).ti,ab.
6. (1 or 2) and (3 or 4 or 5)
7. limit 6 to English language

### PsycINFO <1806 to July Week 4 2016>

1. exp Spinal Cord Injuries/
2. spinal cord injur\*.mp
3. ((spine or spinal) and sci).mp
4. or/1-3
5. exp Mental Disorders/
6. (mental adj3 (health or disorder\*)).mp
7. (anxiety or depression or post-traumatic or posttraumatic or PTSD or bipolar or suicid\* or “self-harm”).ti,ab.
8. exp “SUBSTANCE USE DISORDER”/
9. ((drug\* or alcohol\* or illicit or substance) adj3 (use\* or abus\*).ti,ab.
10. or/5-8
11. 4 and 10

### Cochrane Central Register of Controlled Trials <July 2016>

1. exp Spinal Cord Injuries/
2. spinal cord injur\*.mp
3. ((spine or spinal) and sci).mp

4. or/1-3
5. exp Mental Disorders/
6. (mental adj3 (health or disorder\*)).mp
7. (anxiety or depression or post-traumatic or posttraumatic or PTSD or bipolar or suicid\* or “self-harm”).ti,ab.
8. exp Substance-Related Disorders/
9. ((drug\* or alcohol\* or illicit or substance) adj3 (use\* or abus\*).ti,ab.
10. or/5-9
11. 4 and 10

### Cochrane Database of Systematic Reviews

#### <2005 to August 17, 2016>

1. (((spine or spinal) and cord and injur\*) or sci).ti.

## Appendix B. Included Studies

1. Abdul-Sattar AB. Predictors of functional outcome in patients with traumatic spinal cord injury after inpatient rehabilitation: in Saudi Arabia. *Neurorehabilitation*. 2014;35(2):341-347.
2. Ahoniemi E, Pohjolainen T, Kautiainen H. Survival after spinal cord injury in Finland. *Journal of Rehabilitation Medicine*. 2011;43(6):481-485.
3. Alschuler KN, Jensen MP, Sullivan-Singh SJ, Borson S, Smith AE, Molton IR. The association of age, pain, and fatigue with physical functioning and depressive symptoms in persons with spinal cord injury. *Journal of Spinal Cord Medicine*. 2013;36(5):483-491.
4. Arango-Lasprilla JC, Ketchum JM, Starkweather A, Nicholls E, Wilk AR. Factors predicting depression among persons with spinal cord injury 1 to 5 years post injury. *Neurorehabilitation*. 2011;29(1):9-21.
5. Bailey J, Dijkers MP, Gassaway J, et al. Relationship of nursing education and care management inpatient rehabilitation interventions and patient characteristics to outcomes following spinal cord injury: the SCIR rehab project. *Journal of Spinal Cord Medicine*. 2012;35(6):593-610.
6. Banerjea R, Findley PA, Smith B, Findley T, Sambamoorthi U. Co-occurring medical and mental illness and substance use disorders among veteran clinic users with spinal cord injury patients with complexities. *Spinal Cord*. 2009;47(11):789-795.
7. Binks TM, Radnitz CL, Moran AI, Vinciguerra V. Relationship between level of spinal cord injury

- and posttraumatic stress disorder symptoms. *Ann N Y Acad Sci.* 1997;821:430-432.
8. Boldt I, Eriks-Hoogland I, Brinkhof MW, de Bie R, Joggi D, von Elm E. Non-pharmacological interventions for chronic pain in people with spinal cord injury. *Cochrane Database of Systematic Reviews.* 2014;11:CD009177.
  9. Bombardier CH, Adams LM, Fann JR, Hoffman JM. Depression Trajectories During the First Year After Spinal Cord Injury. *Arch Phys Med Rehabil.* 2016;97(2):196-203.
  10. Bombardier CH, Fann JR, Tate DG, et al. An exploration of modifiable risk factors for depression after spinal cord injury: which factors should we target? *Arch Phys Med Rehabil.* 2012;93(5):775-781.
  11. Bombardier CH, Fann JR, Wilson CS, et al. A randomized controlled trial of venlafaxine XR for major depressive disorder after spinal cord injury: Methods and lessons learned. *Journal of Spinal Cord Medicine.* 2014;37(3):247-263.
  12. Bombardier CH, Kalpakjian CZ, Graves DE, Dyer JR, Tate DG, Fann JR. Validity of the Patient Health Questionnaire-9 in assessing major depressive disorder during inpatient spinal cord injury rehabilitation. *Arch Phys Med Rehabil.* 2012;93(10):1838-1845.
  13. Bombardier CH, Richards JS, Krause JS, Tulsy D, Tate DG. Symptoms of major depression in people with spinal cord injury: implications for screening. *Arch Phys Med Rehabil.* 2004;85(11):1749-1756.
  14. Bradley MB. The effect of participating in a functional electrical stimulation exercise program on affect in people with spinal cord injuries. *Arch Phys Med Rehabil.* 1994;75(6):676-679.
  15. Burns SM, Boyd BL, Hill J, Hough S. Psychosocial predictors of employment status among men living with spinal cord injury. *Rehabilitation Psychology.* 2010;55(1):81-90.
  16. Burns SM, Hough S, Boyd BL, Hill J. Sexual desire and depression following spinal cord injury: Masculine sexual prowess as a moderator. *Sex Roles.* 2009;61(1-2):120-129.
  17. Cao Y, DiPiro ND, Xi J, Krause JS. Unmet expectations of adjustment and depressive symptoms among people with chronic traumatic spinal cord injury. *Rehabilitation Psychology.* 2014;59(3):313-320.
  18. Cao Y, Massaro JF, Krause JS, Chen Y, Devivo MJ. Suicide mortality after spinal cord injury in the United States: injury cohorts analysis. *Arch Phys Med Rehabil.* 2014;95(2):230-235.
  19. Cardenas DD, Nieshoff EC, Suda K, et al. A randomized trial of pregabalin in patients with neuropathic pain due to spinal cord injury. *Neurology.* 2013;80(6):533-539.
  20. Cardenas DD, Warms CA, Turner JA, Marshall H, Brooke MM, Loeser JD. Efficacy of amitriptyline for relief of pain in spinal cord injury: Results of a randomized controlled trial. *Pain.* 2002;96(3):365-373.
  21. Catalano D, Chan F, Wilson L, Chiu CY, Muller VR. The buffering effect of resilience on depression among individuals with spinal cord injury: a structural equation model. *Rehabilitation Psychology.* 2011;56(3):200-211.
  22. Charlifue SW, Gerhart KA. Behavioral and demographic predictors of suicide after traumatic spinal cord injury. *Arch Phys Med Rehabil.* 1991;72(7):488-492.
  23. Cragg JJ, Noonan VK, Noreau L, Borisoff JF, Kramer JK. Neuropathic pain, depression, and cardiovascular disease: a national multicenter study. *Neuroepidemiology.* 2015;44(3):130-137.
  24. Craig A, Nicholson Perry K, Guest R, Tran Y, Middleton J. Adjustment following chronic spinal cord injury: Determining factors that contribute to social participation. *Br J Health Psychol.* 2015;20(4):807-823.
  25. Cuff L, Fann JR, Bombardier CH, Graves DE, Kalpakjian CZ. Depression, pain intensity, and interference in acute spinal cord injury. *Topics in Spinal Cord Injury Rehabilitation.* 2014;20(1):32-39.
  26. Danner G, Radnitz CL. Protective factors and post-traumatic stress disorder in veterans with spinal cord injury. *International Journal of Rehabilitation & Health.* 2000;5(3):195-203.
  27. Daverat P, Petit H, Kemoun G, Dartigues JF, Barat M. The long term outcome in 149 patients with spinal cord injury. *Paraplegia.* 1995;33(11):665-668.

28. DeVivo MJ, Black KJ, Richards JS, Stover SL. Suicide following spinal cord injury. *Paraplegia*. 1991;29(9):620-627.
29. Diego MA, Field T, Hernandez-Reif M, et al. Spinal cord patients benefit from massage therapy. *The International journal of neuroscience*. 2002;112(2):133-142.
30. Dodd Z, Driver S, Warren AM, Riggs S, Clark M. Effects of Adult Romantic Attachment and Social Support on Resilience and Depression in Individuals with Spinal Cord Injuries. *Topics in Spinal Cord Injury Rehabilitation*. 2015;21(2):156-165.
31. Dorstyn D, Mathias J, Denson L. Efficacy of cognitive behavior therapy for the management of psychological outcomes following spinal cord injury: a meta-analysis. *J Health Psychol*. 2011;16(2):374-391.
32. Dorstyn D, Mathias J, Denson L. Applications of telecounseling in spinal cord injury rehabilitation: a systematic review with effect sizes. *Clinical Rehabilitation*. 2013;27(12):1072-1083.
33. Dryden DM, Saunders L, Rowe BH, et al. Depression following Traumatic Spinal Cord Injury. *Neuroepidemiology*. 2005;25(2):55-61.
34. Fann JR, Bombardier CH, Richards J, et al. Venlafaxine extended-release for depression following spinal cord injury: A randomized clinical trial. *JAMA Psychiatry*. 2015;72(3):247-258.
35. Fann JR, Crane DA, Graves DE, Kalpakjian CZ, Tate DG, Bombardier CH. Depression treatment preferences after acute traumatic spinal cord injury. *Arch Phys Med Rehabil*. 2013;94(12):2389-2395.
36. Geisler WO, Jousse AT, Wynne-Jones M, Breithaupt D. Survival in traumatic spinal cord injury. *Paraplegia*. 1983;21(6):364-373.
37. Geyh S, Nick E, Stirnimann D, et al. Self-efficacy and self-esteem as predictors of participation in spinal cord injury—an ICF-based study. *Spinal Cord*. 2012;50(9):699-706.
38. Ginis KA, Latimer AE, McKechnie K, et al. Using exercise to enhance subjective well-being among people with spinal cord injury: The mediating influences of stress and pain. *Rehabilitation Psychology*. 2003;48(3):157-164.
39. Gioia MC, Cerasa A, Di Lucente L, Brunelli S, Castellano V, Traballese M. Psychological impact of sports activity in spinal cord injury patients. *Scand J Med Sci Sports*. 2006;16(6):412-416.
40. Hagen EM, Lie SA, Reikand T, Gilhus NE, Gronning M. Mortality after traumatic spinal cord injury: 50 years of follow-up. *J Neurol Neurosurg Psychiatry*. 2010;81(4):368-373.
41. Hartkopp A, Bronnum-Hansen H, Seidenschner AM, Biering-Sorensen F. Survival and cause of death after traumatic spinal cord injury. A long-term epidemiological survey from Denmark.[Erratum appears in *Spinal Cord* 197 Dec;35(12):862-4]. *Spinal Cord*. 1997;35(2):76-85.
42. Hartoonian N, Hoffman JM, Kalpakjian CZ, Taylor HB, Krause JK, Bombardier CH. Evaluating a spinal cord injury-specific model of depression and quality of life. *Arch Phys Med Rehabil*. 2014;95(3):455-465.
43. Hassanpour K, Hotz-Boendermaker S, Dokladal P, European Multicenter Study for Human Spinal Cord Injury Study g, Curt A. Low depressive symptoms in acute spinal cord injury compared to other neurological disorders. *J Neurol*. 2012;259(6):1142-1150.
44. Hatcher MB, Whitaker C, Karl A. What predicts post-traumatic stress following spinal cord injury? *Br J Health Psychol*. 2009;14(Pt 3):541-561.
45. Hicks AL, Martin KA, Ditor DS, et al. Long-term exercise training in persons with spinal cord injury: effects on strength, arm ergometry performance and psychological well-being. *Spinal cord*. 2003;41(1):34-43.
46. Hoffman JM, Bombardier CH, Graves DE, Kalpakjian CZ, Krause JS. A longitudinal study of depression from 1 to 5 years after spinal cord injury. *Arch Phys Med Rehabil*. 2011;92(3):411-418.
47. Holicky R, Charlifue S. Ageing with spinal cord injury: the impact of spousal support. *Disabil Rehabil*. 1999;21(5-6):250-257.
48. Houlihan BV, Jette A, Friedman RH, et al. A pilot study of a telehealth intervention for persons with spinal cord dysfunction. *Spinal cord*. 2013;51(9):715-720.

49. Houlihan BV, Jette A, Paasche-Orlow M, et al. A tel- erehabilitation intervention for persons with spinal cord dysfunction. *Am J Phys Med Rehabil*. 2011;90(9):756-764.
50. Hwang M, Chlan KM, Vogel LC, Zebracki K. Substance use in young adults with pediatric-onset spinal cord injury. *Spinal Cord*. 2012;50(7):497-501.
51. Hwang M, Zebracki K, Chlan KM, Vogel LC. Longitudinal employment outcomes in adults with pediatric-onset spinal cord injury. *Spinal Cord*. 2014;52(6):477-482.
52. January AM, Zebracki K, Chlan KM, Vogel LC. Men- tal health and risk of secondary medical compli- cations in adults with pediatric-onset spinal cord injury. *Topics in Spinal Cord Injury Rehabilitation*. 2014;20 (1):1-12.
53. January AM, Zebracki K, Chlan KM, Vogel LC. Symptoms of depression over time in adults with pedi- atric-onset spinal cord injury. *Arch Phys Med Rehabil*. 2014;95(3):447-454.
54. January AM, Zebracki K, Chlan KM, Vogel LC. Sleep, well-being, and psychological symptoms in adults with pediatric-onset spinal cord injury. *Rehabilitation Psychology*. 2015;60(4):328-334.
55. January AM, Zebracki K, Czworniak A, Chlan KM, Vogel LC. Predictive factors of hospitalization in adults with pediatric-onset SCI: a longitudinal analysis. *Spinal Cord*. 2015;53(4):314-319.
56. Jensen MP, Smith AE, Bombardier CH, Yorkston KM, Miro J, Molton IR. Social support, depression, and physical disability: age and diagnostic group effects. *Disabil Health J*. 2014;7(2):164-172.
57. Jones K, Simpson GK, Briggs L, Dorsett P. Does spirituality facilitate adjustment and resilience among individuals and families after SCI? *Disabil Rehabil*. 2016;38(10):921-935.
58. Kalpakjian CZ, Albright KJ. An examination of depression through the lens of spinal cord injury. Comparative prevalence rates and severity in women and men. *Womens Health Issues*. 2006;16(6):380-388.
59. Kalpakjian CZ, Bombardier CH, Schomer K, Brown PA, Johnson KL. Measuring depression in persons with spinal cord injury: a systematic review. *Journal of Spinal Cord Medicine*. 2009;32(1):6-24.
60. Kalpakjian CZ, Houlihan B, Meade MA, et al. Marital status, marital transitions, well-being, and spinal cord injury: an examination of the effects of sex and time. *Arch Phys Med Rehabil*. 2011;92(3):433-440.
61. Kemp B, Krause J, Adkins R. Depression among African Americans, Latinos, and Caucasians with spinal cord injury: A exploratory study. *Rehabilitation Psychology*. 1999;44(3):235-247.
62. Kemp B, Tsukerman D, Kahan J, Adkins R. Predict- ing psychosocial outcomes using a brief measure of quality of life in a sample of people with spinal cord injury. *Topics in Spinal Cord Injury Rehabilitation*. 2014;20(3):191-196.
63. Kennedy P, Taylor N, Hindson L. A pilot investi- gation of a psychosocial activity course for people with spinal cord injuries. *Psychol Health Med*. 2006;11(1):91-99.
64. Krause J, Coker J, Charlifue S, Whiteneck GG. Depression and subjective well-being among 97 American Indians with spinal cord injury: A descriptive study. *Rehabilitation Psychology*. 1999;44(4):354-372.
65. Krause JS, Broderick L. Outcomes after spinal cord injury: comparisons as a function of gender and race and ethnicity. *Arch Phys Med Rehabil*. 2004;85 (3):355-362.
66. Krause JS, Carter RE, Pickelsimer EE, Wilson D. A prospective study of health and risk of mortality after spinal cord injury. *Arch Phys Med Rehabil*. 2008;89 (8):1482-1491.
67. Krause JS, Coker JL, Charlifue S, Whiteneck GG. Health outcomes among American Indians with spinal cord injury. *Arch Phys Med Rehabil*. 2000;81 (7):924-931.
68. Krause JS, Kemp B, Coker J. Depression after spinal cord injury: relation to gender, ethnicity, aging, and socioeconomic indicators. *Arch Phys Med Rehabil*. 2000;81(8):1099-1109.
69. Krause JS, Saunders LL. Health, secondary con- ditions, and life expectancy after spinal cord injury. *Arch Phys Med Rehabil*. 2011;92(11):1770-1775.

70. Krause JS, Saunders LL, Newman S. Posttraumatic stress disorder and spinal cord injury. *Arch Phys Med Rehabil*. 2010;91(8):1182-1187.
71. Krause JS, Saunders LL, Reed KS, Coker J, Zhai Y, Johnson E. Comparison of the Patient Health Questionnaire and the Older Adult Health and Mood Questionnaire for self-reported depressive symptoms after spinal cord injury. *Rehabilitation Psychology*. 2009;54(4):440-448.
72. LaVela SL, Burns SP, Goldstein B, Miskevics S, Smith B, Weaver FM. Dysfunctional sleep in persons with spinal cord injuries and disorders. *Spinal Cord*. 2012;50(9):682-685.
73. Le J, Dorstyn D. Anxiety prevalence following spinal cord injury: a meta-analysis. *Spinal Cord*. 2016;54(8):570-578.
74. Lidal IB, Jensen AE, Larsen TW, Stanghelle JK. Fatigue in persons who have lived with spinal cord injury for >20 years. *Spinal Cord*. 2013;51(2):103-108.
75. Lidal IB, Snekkevik H, Aamodt G, Hjeltnes N, Biering- Sorensen F, Stanghelle JK. Mortality after spinal cord injury in Norway. *Journal of Rehabilitation Medicine*. 2007;39(2):145-151.
76. Lin MR, Hwang HF, Yu WY, Chen CY. A prospective study of factors influencing return to work after traumatic spinal cord injury in Taiwan. *Arch Phys Med Rehabil*. 2009;90(10):1716-1722.
77. Liu CW, Huang CC, Chen CH, Yang YH, Chen TW, Huang MH. Prediction of severe neurogenic bowel dysfunction in persons with spinal cord injury. *Spinal Cord*. 2010;48(7):554-559.
78. Lundqvist C, Siosteen A, Sullivan L, Blomstrand C, Lind B, Sullivan M. Spinal cord injuries: a shortened measure of function and mood. *Spinal Cord*. 1997;35(1):17-21.
79. Lusilla-Palacios P, Castellano-Tejedor C. Spinal cord injury and substance use: a systematic review. *Adicciones*. 2015;27(4):294-310.
80. Martin Ginis KA, Latimer AE, McKechnie K, et al. Using exercise to enhance subjective well-being among people with spinal cord injury: The mediating influences of stress and pain. *Rehabilitation psychology*. 2003;48(3):157-164.
81. Martz E. Associations and Predictors of Posttraumatic Stress Levels According to Person-Related, Disability-Related, and Trauma-Related Variables Among Individuals With Spinal Cord Injuries. *Rehabilitation Psychology*. 2005;50(2):149-157.
82. McCullumsmith CB, Kalpakjian CZ, Richards JS, et al. Novel risk factors associated with current suicidal ideation and lifetime suicide attempts in individuals with spinal cord injury. *Arch Phys Med Rehabil*. 2015;96(5):799-808.
83. Mehta S, Orenczuk S, Hansen KT, et al. An evidence-based review of the effectiveness of cognitive behavioral therapy for psychosocial issues post-spinal cord injury. *Rehabilitation Psychology*. 2011;56(1):15-25.
84. Mercier HW, Ni P, Houlihan BV, Jette AM. Differential Impact and Use of a Telehealth Intervention by Persons with MS or SCI. *Am J Phys Med Rehabil*. 2015;94(11):987-999.
85. Migliorini C, Tonge B, Taleporos G. Spinal cord injury and mental health. *Aust N Z J Psychiatry*. 2008;42(4):309-314.
86. Migliorini CE, New PW, Tonge BJ. Comparison of depression, anxiety and stress in persons with traumatic and non-traumatic post-acute spinal cord injury. *Spinal Cord*. 2009;47(11):783-788.
87. Monin JK, Schulz R, Martire LM, Connelly D, Czaja SJ. The personal importance of being independent: Associations with changes in disability and depressive symptoms. *Rehabilitation Psychology*. 2014;59(1):35-41.
88. Muller R, Peter C, Cieza A, Geyh S. The role of social support and social skills in people with spinal cord injury--a systematic review of the literature. *Spinal Cord*. 2012;50(2):94-106.
89. Muller R, Peter C, Cieza A, et al. Social skills: a resource for more social support, lower depression levels, higher quality of life, and participation in individuals with spinal cord injury? *Arch Phys Med Rehabil*. 2015;96(3):447-455.

90. Nam HS, Kim HR, Ha TH, Shin HI. Suicidal ideation in Korean persons with spinal cord injury. *Spinal Cord*. 2013;51(10):789-793.
91. Nelson AL, Groer S, Palacios P, et al. Wheelchair-related falls in veterans with spinal cord injury residing in the community: a prospective cohort study. *Arch Phys Med Rehabil*. 2010;91(8):1166-1173.
92. Nielsen MS. Prevalence of Posttraumatic Stress Disorder in Persons With Spinal Cord Injuries: The Mediating Effect of Social Support. *Rehabilitation Psychology*. 2003;48(4):289-295.
93. Nooijen CF, Stam HJ, Schoenmakers I, et al. Working mechanisms of a behavioural intervention promoting physical activity in persons with subacute spinal cord injury. *Journal of Rehabilitation Medicine*. 2016;48(7):583-588.
94. Norrbrink C, Lundeberg T. Tramadol in neuropathic pain after spinal cord injury: a randomized, double-blind, placebo-controlled trial. *Clin J Pain*. 2009;25(3):177-184.
95. Oh SJ, Shin HI, Paik NJ, Yoo T, Ku JH. Depressive symptoms of patients using clean intermittent catheterization for neurogenic bladder secondary to spinal cord injury. *Spinal Cord*. 2006;44(12):757-762.
96. O'Shea A, Smedema SM. Understanding depressive symptoms among individuals with spinal cord injuries: A biopsychosocial perspective. *Rehabilitation Counseling Bulletin*. 2014;58(1):20-28.
97. Pakpour AH, Kumar S, Scheerman JF, Lin CY, Fridlund B, Jansson H. Oral health-related quality of life in Iranian patients with spinal cord injury: A case-control study. *Injury*. 2016;47(6):1345-1352.
98. Perkes SJ, Bowman J, Penkala S. Psychological therapies for the management of co-morbid depression following a spinal cord injury: a systematic review. *J Health Psychol*. 2014;19(12):1597-1612.
99. Peter C, Muller R, Post MW, et al. Depression in spinal cord injury: assessing the role of psychological resources. *Rehabilitation Psychology*. 2015;60(1):67-80.
100. Radnitz CL, Hsu L, Tirch DD, et al. A comparison of posttraumatic stress disorder in veterans with and without spinal cord injury. *Journal of abnormal psychology*. 1998;107(4):676-680.
101. Radnitz CL, Hsu L, Willard J, et al. Posttraumatic stress disorder in veterans with spinal cord injury: trauma-related risk factors. *J Trauma Stress*. 1998;11(3):505-520.
102. Riggins MS, Kankipati P, Oyster ML, Cooper RA, Boninger ML. The relationship between quality of life and change in mobility 1 year postinjury in individuals with spinal cord injury. *Arch Phys Med Rehabil*. 2011;92(7):1027-1033.
103. Rintala DH, Holmes SA, Courtade D, Fiess RN, Tastard LV, Loubser PG. Comparison of the effectiveness of amitriptyline and gabapentin on chronic neuropathic pain in persons with spinal cord injury. *Archives of physical medicine and rehabilitation*. 2007;88(12):1547-1560.
104. Rintala DH, Robinson-Whelen S, Matamoros R. Subjective stress in male veterans with spinal cord injury. *J Rehabil Res Dev*. 2005;42(3):291-304.
105. Ruhe HG, Dekker JJ, Peen J, Holman R, de Jonghe F. Clinical use of the Hamilton Depression Rating Scale: is increased efficiency possible? A post hoc comparison of Hamilton Depression Rating Scale, Maier and Bech subscales, Clinical Global Impression, and Symptom Checklist-90 scores. *Comprehensive psychiatry*. 2005;46(6):417-427.
106. Sakakibara BM, Miller WC, Orenczuk SG, Wolfe DL, Team SR. A systematic review of depression and anxiety measures used with individuals with spinal cord injury. *Spinal Cord*. 2009;47(12):841-851.
107. Saunders LL, Dipiro ND, Krause JS, Brotherton S, Kraft S. Risk of Fall-Related Injuries among Ambulatory Participants with Spinal Cord Injury. *Topics in Spinal Cord Injury Rehabilitation*. 2013;19(4):259-266.
108. Saunders LL, Krause JS. Psychological factors affecting alcohol use after spinal cord injury. *Spinal Cord*. 2011;49(5):637-642.
109. Saunders LL, Krause JS. Behavioral factors related to fatigue among persons with spinal cord injury. *Arch Phys Med Rehabil*. 2012;93(2):313-318.

110. Saunders LL, Krause JS, Focht KL. A longitudinal study of depression in survivors of spinal cord injury. *Spinal Cord*. 2012;50(1):72-77.
111. Schandler SL, Cohen MJ, Vulpe M, Frank SE. Incidence and characteristics of spinal cord injured patients with a family history of alcoholism. *Journal of Studies on Alcohol*. 1995;56(5):522-527.
112. Schonenberg M, Reimitz M, Jusyte A, Maier D, Badke A, Hautzinger M. Depression, posttraumatic stress, and risk factors following spinal cord injury. *Int J Behav Med*. 2014;21(1):169-176.
113. Schulz R, Czaja SJ, Lustig A, Zdaniuk B, Martire LM, Perdomo D. Improving the quality of life of caregivers of persons with spinal cord injury: a randomized controlled trial. *Rehabilitation psychology*. 2009;54(1):1-15.
114. Siddall PJ, Cousins MJ, Otte A, Griesing T, Chambers R, Murphy TK. Pregabalin in central neuropathic pain associated with spinal cord injury: a placebo-controlled trial. *Neurology*. 2006;67(10):1792-1800.
115. Sweeney TT, Foote JE. Treatment of drug and alcohol abuse in spinal cord injury veterans. *Int J Addict*. 1982;17(5):897-904.
116. Tasiemski T, Brewer BW. Athletic identity, sport participation, and psychological adjustment in people with spinal cord injury. *Adapt Phys Act Q*. 2011;28(3):233-250.
117. Tate D, Forchheimer M, Maynard F, Dijkers M. Predicting depression and psychological distress in persons with spinal cord injury based on indicators of handicap. *Am J Phys Med Rehabil*. 1994;73(3):175-183.
118. Tate DG, Forchheimer MB, Krause JS, Meade MA, Bombardier CH. Patterns of alcohol and substance use and abuse in persons with spinal cord injury: risk factors and correlates. *Arch Phys Med Rehabil*. 2004;85(11):1837-1847.
119. Tsai IH, Graves DE, Lai CH, Hwang LY, Pompeii LA. Association of internet use and depression among the spinal cord injury population. *Arch Phys Med Rehabil*. 2014;95(2):236-243.
120. Ullrich PM, Lincoln RK, Tackett MJ, Miskevics S, Smith BM, Weaver FM. Pain, depression, and health care utilization over time after spinal cord injury. *Rehabilitation Psychology*. 2013;58(2):158-165.
121. Ullrich PM, Smith BM, Blow FC, Valenstein M, Weaver FM. Depression, healthcare utilization, and comorbid psychiatric disorders after spinal cord injury. *Journal of Spinal Cord Medicine*. 2014;37(1):40-45.
122. van Gorp S, Kessels AG, Joosten EA, van Kleef M, Patijn J. Pain prevalence and its determinants after spinal cord injury: a systematic review. *Eur J Pain*. 2015;19(1):5-14.
123. van Leeuwen CM, Kraaijeveld S, Lindeman E, Post MW. Associations between psychological factors and quality of life ratings in persons with spinal cord injury: a systematic review. *Spinal Cord*. 2012;50(3):174-187.
124. Williams R, Murray A. Prevalence of depression after spinal cord injury: a meta-analysis. *Arch Phys Med Rehabil*. 2015;96(1):133-140.
125. Williams RT, Heinemann AW, Neumann HD, et al. Evaluating the Psychometric Properties and Responsiveness to Change of 3 Depression Measures in a Sample of Persons With Traumatic Spinal Cord Injury and Major Depressive Disorder. *Arch Phys Med Rehabil*. 2016;97(6):929-937.
126. Williams RT, Wilson CS, Heinemann AW, Lazowski LE, Fann JR, Bombardier CH. Identifying depression severity risk factors in persons with traumatic spinal cord injury. *Rehabilitation psychology*. 2014;59(1):50-56.
127. Yilmaz B, Yasar E, Koroglu Omac O, Goktepe AS, Tan AK. Gabapentin vs. pregabalin for the treatment of neuropathic pain in patients with spinal cord injury: A crossover study. *Turkiye Fiziksel Tip ve Rehabilitasyon Dergisi*. 2015;61(1):1-5.



### Appendix C. Excluded Studies

The following full-text publications were considered for inclusion but failed to meet the criteria for this report.

#### Exclusion codes

(first reviewer/second reviewer after consensus):

- 2 = Population not included;
- 3 = Intervention not included;
- 4 = Outcome not included;
- 5 = Comparator not included;
- 6 = Study design not included;

- 7 = Not a study (letter, editorial, non-systematic/narrative review);
- 8 = Non-English language;
- 9 = Inadequate duration;
- 10 = Sample size too small for applicable Key Questions;
- 11 = Systematic Review or meta-analysis used as a source document to identify individual studies; 12 = No original data, duplicate data;
- 13 = Individual study in an included systematic review

| Citation Number | Citation                                                                                                                                                                                                                                                                                         | Exclusion Code |
|-----------------|--------------------------------------------------------------------------------------------------------------------------------------------------------------------------------------------------------------------------------------------------------------------------------------------------|----------------|
| 1               | Abeyasinghe NL, de Zoysa P, Bandara KM, Bartholameuz NA, Bandara JM. The prevalence of symptoms of Post-Traumatic Stress Disorder among soldiers with amputation of a limb or spinal injury: a report from a rehabilitation centre in Sri Lanka. <i>Psychol Health Med</i> . 2012;17(3):376-381. | 6/6            |
| 2               | Abramson AS. Modern concepts of management of the patient with spinal cord injury. <i>Arch Phys Med Rehabil</i> . 1967;48(3):113-121.                                                                                                                                                            | 7/7            |
| 3               | Abramson CE, McBride KE, Konnyu KJ, Elliott SL, Team SR. Sexual health outcome measures for individuals with a spinal cord injury: a systematic review. <i>Spinal Cord</i> . 2008;46(5):320-324.                                                                                                 | 4/4            |
| 4               | Agar E, Kennedy P, King NS. The Role of Negative Cognitive Appraisals in PTSD Symptoms Following Spinal Cord Injuries. <i>Behavioural and Cognitive Psychotherapy</i> . 2006;34(4):437-452.                                                                                                      | 13/13          |
| 5               | Akman RY, Coskun Celik E, Karatas M. Sexuality and sexual dysfunction in spinal cord- injured men in Turkey. <i>Turkish Journal of Medical Sciences</i> . 2015;45(4):758-761.                                                                                                                    | 4/4            |
| 6               | Allen-Wright S. Expanding health promotion to individuals with spinal cord injuries. <i>SCI Nurs</i> . 1999;16(3):85-88.                                                                                                                                                                         | 6/6            |
| 7               | Allison DJ, Ditor DS. Targeting inflammation to influence mood following spinal cord injury: A randomized clinical trial. <i>Journal of neuroinflammation</i> . 2015;12(1).                                                                                                                      | 3/3            |
| 8               | Al-Owesie RM, Moussa NM, Robert AA. Anxiety and depression among traumatic spinal cord injured patients. <i>Neurosciences</i> . 2012;17(2):145-150.                                                                                                                                              | 4/4            |
| 9               | Alschuler KN, Kratz AL, Ehde DM. Resilience and vulnerability in individuals with chronic pain and physical disability. <i>Rehabilitation Psychology</i> . 2016;61(1):7-18.                                                                                                                      | 10/10          |
| 10              | Anderson CJ, Krajci KA, Vogel LC. Life satisfaction in adults with pediatric-onset spinal cord injuries. <i>Journal of Spinal Cord Medicine</i> . 2002;25(3):184-190.                                                                                                                            | 4/4            |
| 11              | Anderson CJ, Vogel LC, Betz RR, Willis KM. Overview of adult outcomes in pediatric-onset spinal cord injuries: implications for transition to adulthood. <i>Journal of Spinal Cord Medicine</i> . 2004;27 Suppl 1:S98-106.                                                                       | 10/10          |
| 12              | Anderson CJ, Vogel LC, Chlan KM, Betz RR, McDonald CM. Depression in adults who sustained spinal cord injuries as children or adolescents. <i>Journal of Spinal Cord Medicine</i> . 2007;30 Suppl 1:S76-82.                                                                                      | 6/6            |
| 13              | Anderson CJ, Vogel LC, Chlan KM, Betz RR. Coping with spinal cord injury: strategies used by adults who sustained their injuries as children or adolescents. <i>Journal of Spinal Cord Medicine</i> . 2008;31(3):290-296.                                                                        | 4/4            |
| 14              | Anton HA, Miller WC, Townson AF. Measuring fatigue in persons with spinal cord injury. <i>Arch Phys Med Rehabil</i> . 2008;89(3):538-542.                                                                                                                                                        | 10/10          |
| 15              | Ataoglu E, Tiftik T, Kara M, Tunc H, Ersoz M, Akkus S. Effects of chronic pain on quality of life and depression in patients with spinal cord injury. <i>Spinal Cord</i> . 2013;51(1):23-26.                                                                                                     | 2/2            |
| 16              | Avluk OC, Gurcay E, Gurcay AG, Karaahmet OZ, Tamkan U, Cakki A. Effects of chronic pain on function, depression, and sleep among patients with traumatic spinal cord injury. <i>Ann Saudi Med</i> . 2014;34(3):211-216.                                                                          | 10/10          |
| 17              | Baker FA, Rickard N, Tamplin J, Roddy C. Flow and Meaningfulness as Mechanisms of Change in Self-Concept and Well-Being Following a Songwriting Intervention for People in the Early Phase of Neurorehabilitation. <i>Front Hum Neurosci</i> . 2015;9:299.                                       | 3/3            |
| 18              | Barbonetti A, Cavallo F, Felzani G, Francavilla S, Francavilla F. Erectile dysfunction is the main determinant of psychological distress in men with spinal cord injury. <i>J Sex Med</i> . 2012;9(3):830-836.                                                                                   | 10/10          |
| 19              | Beedie A, Kennedy P. Quality of social support predicts hopelessness and depression post spinal cord injury. <i>Journal of Clinical Psychology in Medical Settings</i> . 2002;9(3):227-234.                                                                                                      | 13/13          |
| 20              | Benony H, Daloz L, Bungener C, Chahraoui K, Frenay C, Auvin J. Emotional factors and subjective quality of life in subjects with spinal cord injuries. <i>Am J Phys Med Rehabil</i> . 2002;81(6):437-445.                                                                                        | 6/6            |
| 21              | Bermond B, Schuerman J, Nieuwenhuijse B, Fasotti L, et al. Spinal cord lesions: Coping and mood states. <i>Clinical Rehabilitation</i> . 1987;1(2):111-117.                                                                                                                                      | 10/10          |

*Continued*

*Continued*

| Citation Number | Citation                                                                                                                                                                                                                                                                    | Exclusion Code |
|-----------------|-----------------------------------------------------------------------------------------------------------------------------------------------------------------------------------------------------------------------------------------------------------------------------|----------------|
| 22              | Berry JW, Elliott TR, Rivera P. Resilient, undercontrolled, and overcontrolled personality prototypes among persons with spinal cord injury. <i>J Pers Assess.</i> 2007;89(3):292-302.                                                                                      | 13/13          |
| 23              | Biering-Sorensen F, Hartkopp A. Spinal cord lesions. <i>Curr Opin Neurol.</i> 1995;8(6):451-455.                                                                                                                                                                            | 6/6            |
| 24              | Blanes L, Carmagnani MI, Ferreira LM. Quality of life and self-esteem of persons with paraplegia living in Sao Paulo, Brazil. <i>Qual Life Res.</i> 2009;18(1):15-21.                                                                                                       | 10/10          |
| 25              | Boakye M, Moore R, Kong M, Skirboll SL, Arrigo RT. Health-related quality-of-life status in Veterans with spinal disorders. <i>Quality of Life Research: An International Journal of Quality of Life Aspects of Treatment, Care &amp; Rehabilitation.</i> 2013;22(1):45-52. | 2/2            |
| 26              | Bockian NR, Lee A, Fidanque CS. Personality disorders and spinal cord injury: A pilot study. <i>Journal of Clinical Psychology in Medical Settings.</i> 2003;10(4):307-313.                                                                                                 | 4/4            |
| 27              | Boekamp JR, Overholser JC, Schubert DS. Depression following a spinal cord injury. <i>Int J Psychiatry Med.</i> 1996;26(3):329-349.                                                                                                                                         | 11/11          |
| 28              | Bombardier CH, Ehde DM, Stoelb B, Molton IR. The relationship of age-related factors to psychological functioning among people with disabilities. <i>Phys Med Rehabil Clin N Am.</i> 2010;21(2):281-297.                                                                    | 11/11          |
| 29              | Bombardier CH, Rimmele CT. Alcohol use and readiness to change after spinal cord injury. <i>Arch Phys Med Rehabil.</i> 1998;79(9):1110-1115.                                                                                                                                | 10/10          |
| 30              | Bombardier CH, Stroud MW, Esselman PC, Rimmele CT. Do preinjury alcohol problems predict poorer rehabilitation progress in persons with spinal cord injury? <i>Arch Phys Med Rehabil.</i> 2004;85(9):1488-1492.                                                             | 13/13          |
| 31              | Bombardier CH. Depression and spinal cord injury. <i>Arch Phys Med Rehabil.</i> 2014;95(2):413-414.                                                                                                                                                                         | 7/7            |
| 32              | Bombardier CH. Venlafaxine XR for depression and pain in spinal cord injury: Major outcomes. <i>Journal of spinal cord medicine.</i> 36(5 SPEC. ISSUE):551.                                                                                                                 | 7/7            |
| 33              | Bonanno GA, Kennedy P, Galatzer-Levy IR, Lude P, Elfstrom ML. Trajectories of resilience, depression, and anxiety following spinal cord injury. <i>Rehabilitation Psychology.</i> 2012;57(3):236-247.                                                                       | 4/4            |
| 34              | Borsbo B, Gerdle B, Peolsson M. Impact of the interaction between self-efficacy, symptoms and catastrophising on disability, quality of life and health in with chronic pain patients. <i>Disabil Rehabil.</i> 2010;32(17):1387-1396.                                       | 10/10          |
| 35              | Boxall J. Care of the spinal cord-injured patient. <i>Can Fam Physician.</i> 1989;35:2435-2439.                                                                                                                                                                             | 7/7            |
| 36              | Bozzacco V. Vulnerability and alcohol and substance abuse in spinal cord injury. <i>Rehabil Nurs.</i> 1990;15(2):70-72.                                                                                                                                                     | 7/7            |
| 37              | Bracken MB, Shepard MJ. Coping and adaptation following acute spinal cord injury: a theoretical analysis. <i>Paraplegia.</i> 1980;18(2):74-85.                                                                                                                              | 7/7            |
| 38              | Buckelew SP, Burk JP, Brownlee-Duffeck M, Frank RG, DeGood D. Cognitive and somatic aspects of depression among a rehabilitation sample: Reliability and validity of SCL-90-R research subscales. <i>Rehabilitation Psychology.</i> 1988;33(2):67-75.                       | 4/4            |
| 39              | Buckelew SP, Frank RG, Elliott TR, Chaney J, Hewett J. Adjustment to spinal cord injury: stage theory revisited. <i>Paraplegia.</i> 1991;29(2):125-130.                                                                                                                     | 13/13          |
| 40              | Budh CN, Osteraker AL. Life satisfaction in individuals with a spinal cord injury and pain. <i>Clinical Rehabilitation.</i> 2007;21(1):89-96.                                                                                                                               | 10/10          |
| 41              | Buunk AP, Zurriaga R, Gonzalez P. Social comparison, coping and depression in people with spinal cord injury. <i>Psychol Health.</i> 2006;21(6):791-807.                                                                                                                    | 13/13          |
| 42              | Byra S. Posttraumatic growth in people with traumatic long-term spinal cord injury: predictive role of basic hope and coping. <i>Spinal Cord.</i> 2016;54(6):478-482.                                                                                                       | 4/4            |
| 43              | Cairns DM, Adkins RH, Scott MD. Pain and depression in acute traumatic spinal cord injury: origins of chronic problematic pain? <i>Arch Phys Med Rehabil.</i> 1996;77(4):329-335.                                                                                           | 10/10          |
| 44              | Cao Y, Walker EA, Krause JS. Environmental barriers and subjective health among people with chronic spinal cord injury: A cohort study. <i>Journal of Spinal Cord Medicine.</i> 2015;38(4):526-531.                                                                         | 2/2            |
| 45              | Castriotta RJ, Wilde MC, Sahay S. Sleep disorders in spinal cord injury. <i>Sleep Medicine Clinics.</i> 2012;7(4):643-653.                                                                                                                                                  | 7/7            |
| 46              | Chan RC, Lee PW, Lieh-Mak F. Coping with spinal cord injury: personal and marital adjustment in the Hong Kong Chinese setting. <i>Spinal Cord.</i> 2000;38(11):687-696.                                                                                                     | 10/10          |
| 47              | Chan RC, Lee PW, Lieh-Mak F. The pattern of coping in persons with spinal cord injuries. <i>Disabil Rehabil.</i> 2000;22(11):501-507.                                                                                                                                       | 13/13          |
| 48              | Chapin MH, Holbert D. Differences in affect, life satisfaction, and depression between successfully and unsuccessfully rehabilitated persons with spinal cord injuries. <i>Rehabilitation Counseling Bulletin.</i> 2009;53(1):6-15.                                         | 10/10          |
| 49              | Charlifue S, Apple D, Burns SP, et al. Mechanical ventilation, health, and quality of life following spinal cord injury. <i>Archives of physical medicine and rehabilitation.</i> 2011;92(3):457-463.                                                                       | 4/4            |
| 50              | Charlifue S, Gerhart K. Changing psychosocial morbidity in people aging with spinal cord injury. <i>Neurorehabilitation.</i> 2004;19(1):15-23.                                                                                                                              | 2/2            |
| 51              | Chen Y, Anderson CJ, Vogel LC, Chlan KM, Betz RR, McDonald CM. Change in life satisfaction of adults with pediatric-onset spinal cord injury. <i>Arch Phys Med Rehabil.</i> 2008;89(12):2285-2292.                                                                          | 10/10          |

*Continued*

**Continued**

| Citation Number | Citation                                                                                                                                                                                                                                                                                                                                                      | Exclusion Code |
|-----------------|---------------------------------------------------------------------------------------------------------------------------------------------------------------------------------------------------------------------------------------------------------------------------------------------------------------------------------------------------------------|----------------|
| 52              | Chevalier Z, Kennedy P, Sherlock O. Spinal cord injury, coping and psychological adjustment: a literature review. <i>Spinal Cord</i> . 2009;47(11):778-782.                                                                                                                                                                                                   | 7/7            |
| 53              | Chung MC, Preveza E, Papandreou K, Prevezas N. Locus of control among spinal cord injury patients with different levels of posttraumatic stress disorder. <i>Psychiatry Res</i> . 2007;152(2-3):253-260.                                                                                                                                                      | 10/10          |
| 54              | Chung MC, Preveza E, Papandreou K, Prevezas N. Spinal cord injury, posttraumatic stress, and locus of control among the elderly: a comparison with young and middle-aged patients. <i>Psychiatry</i> . 2006;69(1):69-80.                                                                                                                                      | 10/10          |
| 55              | Chung MC, Preveza E, Papandreou K, Prevezas N. The relationship between posttraumatic stress disorder following spinal cord injury and locus of control. <i>J Affect Disord</i> . 2006;93(1-3):229-232.                                                                                                                                                       | 2/2            |
| 56              | Clay DL, Hagglund KJ, Frank RG, Elliott TR, Chaney JM. Enhancing the accuracy of depression diagnosis in patients with spinal cord injury using Bayesian analysis. <i>Rehabilitation Psychology</i> . 1995;40(3):171-180.                                                                                                                                     | 13/13          |
| 57              | Cobo Cuenca AI, Sampietro-Crespo A, Virseda-Chamorro M, Martin-Espinosa N. Psychological impact and sexual dysfunction in men with and without spinal cord injury. <i>J Sex Med</i> . 2015;12(2):436-444.                                                                                                                                                     | 4/4            |
| 58              | Coleman JA, Harper LA, Perrin PB, et al. The relationship between physical and mental health variables in individuals with spinal cord injury from Latin America. <i>Pm R</i> . 2015;7(1):9-16.                                                                                                                                                               | 2/2            |
| 59              | Cook DW. A multivariate analysis of motivational attributes among spinal cord injured rehabilitation clients. <i>International Journal of Rehabilitation Research</i> . 1981;4(1):5-15.                                                                                                                                                                       | 4/4            |
| 60              | Cook DW. Psychological adjustment to spinal cord injury: Incidence of denial, depression, and anxiety. <i>Rehabilitation Psychology</i> . 1979;26(3):97-104.                                                                                                                                                                                                  | 4/4            |
| 61              | Cook DW. Psychological aspects of spinal cord injury. <i>Rehabilitation Counseling Bulletin</i> . 1976;19(4):535-543.                                                                                                                                                                                                                                         | 7/7            |
| 62              | Cook KF, Bamer AM, Amtmann D, Molton IR, Jensen MP. Six patient-reported outcome measurement information system short form measures have negligible age- or diagnosis-related differential item functioning in individuals with disabilities. <i>Arch Phys Med Rehabil</i> . 2012;93(7):1289-1291.                                                            | 2/2            |
| 63              | Cook KF, Kallen MA, Bombardier C, et al. Do measures of depressive symptoms function differently in people with spinal cord injury versus primary care patients: The ces-d, phq-9, and promis-d. <i>Quality of Life Research: An International Journal of Quality of Life Aspects of Treatment, Care &amp; Rehabilitation</i> . 2016:No Pagination Specified. | 4/4            |
| 64              | Corcoran JR, Frank RG, Elliott TR. The interpersonal influence of depression following spinal cord injury: A methodological study. <i>Journal of the Multihandicapped Person</i> . 1988;1(3):161-174.                                                                                                                                                         | 6/6            |
| 65              | Coyle CP, Lesnik-Emas S, Kinney WB. Predicting life satisfaction among adults with spinal cord injuries. <i>Rehabilitation Psychology</i> . 1994;39(2):95-112.                                                                                                                                                                                                | 13/13          |
| 66              | Coyle CP, Shank JW, Kinney W, Hutchins DA. Psychosocial functioning and changes in leisure lifestyle among individuals with chronic secondary health problems related to spinal cord injury. <i>Therapeutic Recreation Journal</i> . 1993;27(4):239-252.                                                                                                      | 13/13          |
| 67              | Craig A, Hancock K, Dickson H. Improving the long-term adjustment of spinal cord injured persons. <i>Spinal cord</i> . 1999;37(5):345-350.                                                                                                                                                                                                                    | 10/10          |
| 68              | Craig A, Hancock K. Difficulties in implementing group cognitive behaviour therapy for spinal cord injured persons: A clinical discussion. <i>Australian Psychologist</i> . 1994;29(2):98-102.                                                                                                                                                                | 7/7            |
| 69              | Craig A, Nicholson Perry K, Guest R, et al. Prospective Study of the Occurrence of Psychological Disorders and Comorbidities after Spinal Cord Injury. <i>Archives of physical medicine and rehabilitation</i> . 2015;96(8):1426-1434.                                                                                                                        | 10/10          |
| 70              | Craig A, Rodrigues D, Tran Y, Guest R, Bartrop R, Middleton J. Developing an algorithm capable of discriminating depressed mood in people with spinal cord injury. <i>Spinal Cord</i> . 2014;52(5):413-416.                                                                                                                                                   | 4/4            |
| 71              | Craig A, Tran Y, Middleton J. Psychological morbidity and spinal cord injury: a systematic review. <i>Spinal Cord</i> . 2009;47(2):108-114.                                                                                                                                                                                                                   | 2/2            |
| 72              | Craig A, Tran Y, Siddall P, et al. Developing a model of associations between chronic pain, depressive mood, chronic fatigue, and self-efficacy in people with spinal cord injury. <i>Journal of Pain</i> . 2013;14(9):911-920.                                                                                                                               | 4/4            |
| 73              | Craig A, Tran Y, Wijesuriya N, Middleton J. Fatigue and tiredness in people with spinal cord injury. <i>J Psychosom Res</i> . 2012;73(3):205-210.                                                                                                                                                                                                             | 10/10          |
| 74              | Craig AR, Hancock K, Chang E, Dickson H. Immunizing against depression and anxiety after spinal cord injury. <i>Archives of physical medicine and rehabilitation</i> . 1998;79:375-377.                                                                                                                                                                       | 13/13          |
| 75              | Craig AR, Hancock K, Dickson H, Chang E. Long-term psychological outcomes in spinal cord injured persons: results of a controlled trial using cognitive behavior therapy. <i>Archives of physical medicine and rehabilitation</i> . 1997;78(1):33-38.                                                                                                         | 13/13          |
| 76              | Craig AR, Hancock KM, Dickson HG. A longitudinal investigation into anxiety and depression in the first 2 years following a spinal cord injury. <i>Paraplegia</i> . 1994;32(10):675-679.                                                                                                                                                                      | 10/10          |
| 77              | Craig AR, Hancock KM, Dickson HG. Spinal cord injury: a search for determinants of depression two years after the event. <i>Br J Clin Psychol</i> . 1994;33(Pt 2):221-230.                                                                                                                                                                                    | 13/13          |

*Continued*

*Continued*

| Citation Number | Citation                                                                                                                                                                                                                                                                                                                                   | Exclusion Code |
|-----------------|--------------------------------------------------------------------------------------------------------------------------------------------------------------------------------------------------------------------------------------------------------------------------------------------------------------------------------------------|----------------|
| 78              | Craven C, Hitzig SL, Mittmann N. Impact of impairment and secondary health conditions on health preference among Canadians with chronic spinal cord injury. <i>Journal of Spinal Cord Medicine</i> . 2012;35(5):361-370.                                                                                                                   | 10/10          |
| 79              | Crawford JJ, Gayman AM, Tracey J. An examination of post-traumatic growth in Canadian and American ParaSport athletes with acquired spinal cord injury. <i>Psychology of Sport and Exercise</i> . 2014;15(4):399-406.                                                                                                                      | 10/10          |
| 80              | Crewe NM. Life stories of people with long-term spinal cord injury. <i>Rehabilitation Counseling Bulletin</i> . 1997;41(1):26-42.                                                                                                                                                                                                          | 6/6            |
| 81              | Crews WD, Jr., Hensley LG, Goering AM, Barth JT, Rusek JT. Spinal cord injury and anxiety: a comprehensive review. <i>Neurorehabilitation</i> . 1998;11(3):155-174.                                                                                                                                                                        | 11/11          |
| 82              | Crisp R. Depression and occupational disability in five diagnostic groups: a review of recent research. <i>Disabil Rehabil</i> . 2007;29(4):267-279.                                                                                                                                                                                       | 11/11          |
| 83              | Crisp R. The long-term adjustment of 60 persons with spinal cord injury. <i>Australian Psychologist</i> . 1992;27(1):43-47.                                                                                                                                                                                                                | 10/10          |
| 84              | Crumbaugh JC. Cross-validation of Purpose-in-Life test based on Frankl's concepts. <i>Journal of individual psychology</i> . 1968;24(1):74-81.                                                                                                                                                                                             | 6/6            |
| 85              | Cruz-Almeida Y, Alameda G, Widerstrom-Noga EG. Differentiation between pain-related interference and interference caused by the functional impairments of spinal cord injury. <i>Spinal Cord</i> . 2009;47(5):390-395.                                                                                                                     | 4/4            |
| 86              | Cushman LA, Dijkers MP. Depressed mood in spinal cord injured patients: staff perceptions and patient realities. <i>Arch Phys Med Rehabil</i> . 1990;71(3):191-196.                                                                                                                                                                        | 4/4            |
| 87              | Dahlberg A, Alaranta H, Sintonen H. Health-related quality of life in persons with traumatic spinal cord lesion in Helsinki. <i>Journal of Rehabilitation Medicine</i> . 2005;37(5):312-316.                                                                                                                                               | 2/2            |
| 88              | Dajpratham P, Kongkasuwan R. Quality of life among the traumatic spinal cord injured patients. <i>J Med Assoc Thai</i> . 2011;94(10):1252-1259.                                                                                                                                                                                            | 10/10          |
| 89              | Daniel A, Manigandan C. Efficacy of leisure intervention groups and their impact on quality of life among people with spinal cord injury. <i>International journal of rehabilitation research</i> . 2005;Internationale Zeitschrift für Rehabilitationsforschung. <i>Revue internationale de recherches de réadaptation</i> . 28(1):43-48. | 4/4            |
| 90              | Davidoff G, Roth E, Thomas P, et al. Depression among acute spinal cord injury patients: A study utilizing the Zung Self-Rating Depression Scale. <i>Rehabilitation Psychology</i> . 1990;35(3):171-180.                                                                                                                                   | 10/10          |
| 91              | Davidoff G, Roth E, Thomas P, et al. Depression and neuropsychological test performance in acute spinal cord injury patients: lack of correlation. <i>Arch Clin Neuropsychol</i> . 1990;5(1):77-88.                                                                                                                                        | 10/10          |
| 92              | Davidoff GN, Roth EJ, Richards JS. Cognitive deficits in spinal cord injury: epidemiology and outcome. <i>Arch Phys Med Rehabil</i> . 1992;73(3):275-284.                                                                                                                                                                                  | 6/6            |
| 93              | Davis F, Kumaran D S, Nair S, J V. Physical fitness training for people with spinal cord injury. <i>Cochrane Database of Systematic Reviews</i> . 2009(4).                                                                                                                                                                                 | 11/11          |
| 94              | de Carvalho SA, Andrade MJ, Tavares MA, de Freitas JL. Spinal cord injury and psychological response. <i>Gen Hosp Psychiatry</i> . 1998;20(6):353-359.                                                                                                                                                                                     | 10/10          |
| 95              | Dean RE, Kennedy P. Measuring appraisals following acquired spinal cord injury: a preliminary psychometric analysis of the appraisals of disability. <i>Rehabilitation Psychology</i> . 2009;54(2):222-231.                                                                                                                                | 2/2            |
| 96              | Decker SD, Schulz R. Correlates of life satisfaction and depression in middle-aged and elderly spinal cord-injured persons. <i>Am J Occup Ther</i> . 1985;39(11):740-745.                                                                                                                                                                  | 10/10          |
| 97              | deRoos-Cassini TA, de S, Valvano AK, Hastings J, Brasel KJ. Meaning-Making Appraisals Relevant to Adjustment for Veterans With Spinal Cord Injury. <i>Psychol Serv</i> . 2012;No Pagination Specified.                                                                                                                                     | 10/10          |
| 98              | Derrett S, Beaver C, Sullivan MJ, Herbison GP, Acland R, Paul C. Traumatic and non-traumatic spinal cord impairment in New Zealand: incidence and characteristics of people admitted to spinal units. <i>Inj Prev</i> . 2012;18(5):343-346.                                                                                                | 10/10          |
| 99              | DeVivo MJ, Kartus PL, Stover SL, Rutt RD, Fine PR. Cause of death for patients with spinal cord injuries. <i>Arch Intern Med</i> . 1989;149(8):1761-1766.                                                                                                                                                                                  | 4/4            |
| 100             | Dijkers M, Cushman LA. Differences between rehabilitation disciplines in views of depression in spinal cord injury patients. <i>Paraplegia</i> . 1990;28(6):380-391.                                                                                                                                                                       | 3/3            |
| 101             | Dijkers MP. Quality of life of individuals with spinal cord injury: a review of conceptualization, measurement, and research findings. <i>J Rehabil Res Dev</i> . 2005;42(3 Suppl 1):87-110.                                                                                                                                               | 7/7            |
| 102             | Dinoff BL, Richards JS, Ness TJ. Use of topiramate for spinal cord injury-related pain. <i>Journal of Spinal Cord Medicine</i> . 2003;26(4):401-403.                                                                                                                                                                                       | 6/6            |
| 103             | Dishman RK, Berthoud HR, Booth FW, et al. Neurobiology of exercise. <i>Obesity (Silver Spring)</i> . 2006;14(3):345-356.                                                                                                                                                                                                                   | 6/6            |
| 104             | Ditre JW, Radnitz CL. Pre- and Postinjury Substance Misuse Among Veterans With Spinal Cord Injury. <i>Rehabilitation Psychology</i> . 2005;50(2):142-148.                                                                                                                                                                                  | 10/10          |
| 105             | Dorstyn D, Mathias J, Denson L, Robertson M. Effectiveness of telephone counseling in managing psychological outcomes after spinal cord injury: a preliminary study. <i>Archives of physical medicine and rehabilitation</i> . 2012;93(11):2100-2108.                                                                                      | 13/13          |

*Continued*

**Continued**

| Citation Number | Citation                                                                                                                                                                                                                                               | Exclusion Code |
|-----------------|--------------------------------------------------------------------------------------------------------------------------------------------------------------------------------------------------------------------------------------------------------|----------------|
| 106             | Dorstyn D, Mathias J, Denson L. Psychosocial outcomes of telephone-based counseling for adults with an acquired physical disability: A meta-analysis. <i>Rehabilitation Psychology</i> . 2011;56(1):1-14.                                              | 11/11          |
| 107             | Drainoni ML, Houlihan B, Williams S, et al. Patterns of Internet use by persons with spinal cord injuries and relationship to health-related quality of life. <i>Arch Phys Med Rehabil</i> . 2004;85(11):1872-1879.                                    | 4/4            |
| 108             | Driver S, Warren AM, Reynolds M, et al. Identifying predictors of resilience at inpatient and 3-month post-spinal cord injury. <i>Journal of Spinal Cord Medicine</i> . 2016;39(1):77-84.                                                              | 10/10          |
| 109             | Ducharme S, Murray FM. The Role of Self Destruction in spinal cord injury mortality. <i>Model Systems SCI Digest</i> . 1980;2:29-38.                                                                                                                   | 10/10          |
| 110             | Duchnick JJ, Letsch EA, Curtiss G. Coping effectiveness training during acute rehabilitation of spinal cord injury/dysfunction: a randomized clinical trial. <i>Rehabilitation psychology</i> . 2009;54(2):123-132.                                    | 13/13          |
| 111             | Dunn J, Sinnott KA, Nunnerley J, Scheuringer M. Utilisation of patient perspective to validate clinical measures of outcome following spinal cord injury. <i>Disabil Rehabil</i> . 2009;31(12):967-975.                                                | 4/4            |
| 112             | Dunn M, Davis R. The perceived effects of marijuana on spinal cord injured males. <i>Paraplegia</i> . 1974;12(3):175.                                                                                                                                  | 6/6            |
| 113             | Dunn M, Love L, Ravesloot C. Subjective health in spinal cord injury after outpatient healthcare follow-up. <i>Spinal Cord</i> . 2000;38(2):84-91.                                                                                                     | 2/2            |
| 114             | Ebrahimzadeh MH, Makhmalbaf H, Soltani-Moghaddas SH, Mazlumi SM. The spinal cord injury quality-of-life-23 questionnaire, Iranian validation study. <i>J</i> . 2014;19(4):349-354.                                                                     | 4/4            |
| 115             | Ebrahimzadeh MH, Soltani-Moghaddas SH, Birjandinejad A, Omid-Kashani F, Bozorgnia S. Quality of life among veterans with chronic spinal cord injury and related variables. <i>Arch</i> . 2014;3(2):e17917.                                             | 10/10          |
| 116             | Egner A, Phillips VL, Vora R, Wiggers E. Depression, fatigue, and health-related quality of life among people with advanced multiple sclerosis: results from an exploratory telerehabilitation study. <i>NeuroRehabilitation</i> . 2003;18(2):125-133. | 2/2            |
| 117             | Elliott TR, Kurylo M, Chen Y, Hicken B. Alcohol abuse history and adjustment following spinal cord injury. <i>Rehabilitation Psychology</i> . 2002;47(3):278-290.                                                                                      | 2/2            |
| 118             | Elliott FC. A nursing protocol for anxiety following catastrophic injury. <i>Rehabil Nurs</i> . 1983;8(3):18-20, 38.                                                                                                                                   | 6/6            |
| 119             | Elliott TR, Frank RG. Depression following spinal cord injury. <i>Arch Phys Med Rehabil</i> . 1996;77(8):816-823.                                                                                                                                      | 7/7            |
| 120             | Elliott TR, Godshall FJ, Herrick SM, Witty TE, Spruell M. Problem-solving appraisal and psychological adjustment following spinal cord injury. <i>Cognitive Therapy and Research</i> . 1991;15(5):387-398.                                             | 13/13          |
| 121             | Elliott TR, Herrick SM, Patti AM, Witty TE, Godshall FJ, Spruell M. Assertiveness, social support, and psychological adjustment following spinal cord injury. <i>Behav Res Ther</i> . 1991;29(5):485-493.                                              | 13/13          |
| 122             | Elliott TR, Herrick SM, Witty TE, Godshall F, Spruell M. Social support and depression following spinal cord injury. <i>Rehabilitation Psychology</i> . 1992;37(1):37-48.                                                                              | 13/13          |
| 123             | Elliott TR, Kennedy P. Treatment of Depression Following Spinal Cord Injury: An Evidence-Based Review. <i>Rehabilitation Psychology</i> . 2004;49(2):134-139.                                                                                          | 11/11          |
| 124             | Elliott TR, Witty TE, Herrick S, Hoffman JT. Negotiating reality after physical loss: hope, depression, and disability. <i>J Pers Soc Psychol</i> . 1991;61(4):608-613.                                                                                | 10/10          |
| 125             | Ernst FA. Contrasting perceptions of distress by research personnel and their spinal cord injured subjects. <i>Am J Phys Med</i> . 1987;66(1):12-15.                                                                                                   | 4/4            |
| 126             | Faber RA. Depression and spinal cord injury. <i>Neuroepidemiology</i> . 2005;25(2):53-54.                                                                                                                                                              | 7/7            |
| 127             | Fann JR, Bombardier CH, Dikmen S, et al. Validity of the Patient Health Questionnaire-9 in assessing depression following traumatic brain injury. <i>J Head Trauma Rehabil</i> . 2005;20(6):501-511.                                                   | 2/2            |
| 128             | Fann JR, Bombardier CH, Richards JS, et al. Depression after spinal cord injury: comorbidities, mental health service use, and adequacy of treatment. <i>Arch Phys Med Rehabil</i> . 2011;92(3):352-360.                                               | 10/10          |
| 129             | Fedoroff JP, Lipsey JR, Starkstein SE, Forrester A, Price TR, Robinson RG. Phenomenological comparisons of major depression following stroke, myocardial infarction or spinal cord lesions. <i>J Affect Disord</i> . 1991;22(1-2):83-89.               | 10/10          |
| 130             | Fekete C, Siegrist J, Reinhardt JD, Brinkhof MW, Swi SCISG. Is financial hardship associated with reduced health in disability? The case of spinal cord injury in Switzerland. <i>PLoS ONE</i> . 2014;9(2):e90130.                                     | 2/2            |
| 131             | Ferington FE. Personal control and coping effectiveness in spinal cord injured persons. <i>Res Nurs Health</i> . 1986;9(3):257-265.                                                                                                                    | 4/4            |
| 132             | Field-Fote EC, Brown KM, Lindley SD. Influence of posture and stimulus parameters on post-activation depression of the soleus H-reflex in individuals with chronic spinal cord injury. <i>Neurosci Lett</i> . 2006;410(1):37-41.                       | 4/4            |
| 133             | Findley PA, Banerjee R, Sambamoorthi U. Excess mortality associated with mental illness and substance use disorders among veteran clinic users with spinal cord injury. <i>Disabil Rehabil</i> . 2011;33(17-18):1608-1615.                             | 13/13          |
| 134             | Fogelberg DJ, Vitiello MV, Hoffman JM, Bamer AM, Amtmann D. Comparison of self-report sleep measures for individuals with multiple sclerosis and spinal cord injury. <i>Arch Phys Med Rehabil</i> . 2015;96(3):478-483.                                | 4/4            |

*Continued*

*Continued*

| Citation Number | Citation                                                                                                                                                                                                                                                            | Exclusion Code |
|-----------------|---------------------------------------------------------------------------------------------------------------------------------------------------------------------------------------------------------------------------------------------------------------------|----------------|
| 135             | Foreman PE, Cull J, Kirkby RJ. Sports participation in individuals with spinal cord injury: demographic and psychological correlates. <i>International Journal of Rehabilitation Research</i> . 1997;20(2):159-168.                                                 | 2/2            |
| 136             | Frank RG, Chaney JM, Clay DL, et al. Dysphoria: a major symptom factor in persons with disability or chronic illness. <i>Psychiatry Res</i> . 1992;43(3):231-241.                                                                                                   | 4/4            |
| 137             | Frank RG, Elliott TR, Buckelew SP, Haut AE. Age as a factor in response to spinal cord injury. <i>Am J Phys Med Rehabil</i> . 1988;67(3):128-131.                                                                                                                   | 10/10          |
| 138             | Frank RG, Elliott TR, Corcoran JR, Wonderlich SA. Depression after spinal cord injury: Is it necessary? <i>Clinical Psychology Review</i> . 1987;7(6):611-630.                                                                                                      | 11/11          |
| 139             | Frank RG, Elliott TR, Wonderlich SA, Corcoran JR, Umlauf RL, Ashkanazi GS. Gender differences in the interpersonal response to depression and spinal cord injury. <i>Cognitive Therapy and Research</i> . 1987;11(4):437-448.                                       | 3/3            |
| 140             | Frank RG, Elliott TR. Life stress and psychologic adjustment following spinal cord injury. <i>Arch Phys Med Rehabil</i> . 1987;68(6):344-347.                                                                                                                       | 10/10          |
| 141             | Frank RG, Elliott TR. Spinal cord injury and health locus of control beliefs. <i>Paraplegia</i> . 1989;27(4):250-256.                                                                                                                                               | 13/13          |
| 142             | Frank RG, Kashani JH, Wonderlich SA, Lising A, Visot LR. Depression and adrenal function in spinal cord injury. <i>Am J Psychiatry</i> . 1985;142(2):252-253.                                                                                                       | 10/10          |
| 143             | Frank RG, Umlauf RL, Wonderlich SA, Askanazi GS, Buckelew SP, Elliott TR. Differences in coping styles among persons with spinal cord injury: A cluster-analytic approach. <i>Journal of Consulting and Clinical Psychology</i> . 1987;55(5):727-731.               | 10/10          |
| 144             | Franulic A, Carbonell CG, Pinto P, Sepulveda I. Psychosocial adjustment and employment outcome 2, 5 and 10 years after TBI. <i>Brain Inj</i> . 2004;18(2):119-129.                                                                                                  | 2/2            |
| 145             | Fraser AR. The psychiatrist in the spinal unit. <i>Australian and New Zealand Journal of Psychiatry</i> . 1982;16(4):246-250.                                                                                                                                       | 7/7            |
| 146             | Frisbie JH, Tun CG. Drinking and spinal cord injury. <i>J Am Paraplegia Soc</i> . 1984;7(4):71-73.                                                                                                                                                                  | 4/4            |
| 147             | Fuhrer MJ, Rintala DH, Hart KA, Clearman R, Young ME. Depressive symptomatology in persons with spinal cord injury who reside in the community. <i>Arch Phys Med Rehabil</i> . 1993;74(3):255-260.                                                                  | 4/4            |
| 148             | Fukunishi I, Koyama I, Tombimatsu H. Psychological acceptance and alexithymia in spinal cord injury patients. <i>Psychol Rep</i> . 1995;76(2):475-481.                                                                                                              | 4/4            |
| 149             | Fullerton DT, Harvey RF, Klein MH, Howell T. Psychiatric disorders in patients with spinal cord injuries. <i>Arch Gen Psychiatry</i> . 1981;38(12):1369-1371.                                                                                                       | 10/10          |
| 150             | Furlan JC, Bracken MB, Fehlings MG. Is age a key determinant of mortality and neurological outcome after acute traumatic spinal cord injury? <i>Neurobiology of aging</i> . 2010;31(3):434-446.                                                                     | 2/2            |
| 151             | Galea M, Tumminia J, Garback LM. Telerehabilitation in spinal cord injury persons: a novel approach. <i>Telemed J E Health</i> . 2006;12(2):160-162.                                                                                                                | 7/7            |
| 152             | Galvin LR, Godfrey HP. The impact of coping on emotional adjustment to spinal cord injury (SCI): review of the literature and application of a stress appraisal and coping formulation. <i>Spinal Cord</i> . 2001;39(12):615-627.                                   | 7/7            |
| 153             | Gerhart KA, Johnson RL, Whiteneck GG. Health and psychosocial issues of individuals with incomplete and resolving spinal cord injuries. <i>Paraplegia</i> . 1992;30(4):282-287.                                                                                     | 13/13          |
| 154             | Geyh S, Kunz S, Muller R, Peter C, Swi SCISG. Describing functioning and health after spinal cord injury in the light of psychological-personal factors. <i>Journal of Rehabilitation Medicine</i> . 2016;48(2):219-234.                                            | 11/11          |
| 155             | Geyh S, Nick E, Stirnimann D, Ehrat S, Muller R, Michel F. Biopsychosocial outcomes in individuals with and without spinal cord injury: a Swiss comparative study. <i>Spinal Cord</i> . 2012;50(8):614-622.                                                         | 10/10          |
| 156             | Giannini MJ, Bergmark B, Kreshover S, Elias E, Plummer C, O'Keefe E. Understanding suicide and disability through three major disabling conditions: Intellectual disability, spinal cord injury, and multiple sclerosis. <i>Disabil Health J</i> . 2010;3(2):74-78. | 11/11          |
| 157             | Giannoccaro MP, Moghadam KK, Pizze F, et al. Sleep disorders in patients with spinal cord injury. <i>Sleep Med Rev</i> . 2013;17(6):399-409.                                                                                                                        | 4/4            |
| 158             | Giardino ND, Jensen MP, Turner JA, Ehde DM, Cardenas DD. Social environment moderates the association between catastrophizing and pain among persons with a spinal cord injury. <i>Pain</i> . 2003;106(1-2):19-25.                                                  | 10/10          |
| 159             | Gichia JW, Glenn L. Sufficiency of a two factor model for posttraumatic stress disorder symptoms in spinal injury. <i>Arch Psychiatr Nurs</i> . 2015;29(4):236-237.                                                                                                 | 7/7            |
| 160             | Glass CA. Psychological intervention in physical disability-with special reference to spinal cord injury. <i>Journal of Mental Health</i> . 1994;3(4):467-476.                                                                                                      | 7/7            |
| 161             | Goldman RL, Radnitz CL, McGrath RE. Posttraumatic stress disorder and major depression in veterans with spinal cord injury. <i>Rehabilitation Psychology</i> . 2008;53(2):162-170.                                                                                  | 2/2            |
| 162             | Gorman C, Kennedy P, Hamilton LR. Alterations in self-perceptions following childhood onset of spinal cord injury. <i>Spinal Cord</i> . 1998;36(3):181-185.                                                                                                         | 10/10          |
| 163             | Graves DE, Bombardier CH. Improving the efficiency of screening for major depression in people with spinal cord injury. <i>Journal of Spinal Cord Medicine</i> . 2008;31(2):177-184.                                                                                | 4/4            |

*Continued*

**Continued**

| Citation Number | Citation                                                                                                                                                                                                                                                                                                             | Exclusion Code |
|-----------------|----------------------------------------------------------------------------------------------------------------------------------------------------------------------------------------------------------------------------------------------------------------------------------------------------------------------|----------------|
| 164             | Griffiths HC, Clinpsy D, Kennedy P. Continuing with life as normal:: positive psychological outcomes following spinal cord injury. <i>Topics in Spinal Cord Injury Rehabilitation</i> . 2012;18(3):241-252.                                                                                                          | 10/10          |
| 165             | Griffiths T, Myers D, Talbot A. A study of the validity of the scaled version of the General Health Questionnaire in paralysed spinally injured out-patients. <i>Psychological Medicine</i> . 1993;23(2):497-504.                                                                                                    | 4/4            |
| 166             | Groah SL, Stiens SA, Gittler MS, Kirshblum SC, McKinley WO. Spinal cord injury medicine. 5. Preserving wellness and independence of the aging patient with spinal cord injury: a primary care approach for the rehabilitation medicine specialist. <i>Arch Phys Med Rehabil</i> . 2002;83(3 Suppl 1):S82-89, S90-88. | 6/6            |
| 167             | Guest R, Craig A, Perry KN, et al. Resilience following spinal cord injury: A prospective controlled study investigating the influence of the provision of group cognitive behavior therapy during inpatient rehabilitation. <i>Rehabilitation psychology</i> . 2015;60(4):311-321.                                  | 6/6            |
| 168             | Gupta A, Deepika S, Taly AB, Srivastava A, Surender V, Thyloth M. Quality of life and psychological problems in patients undergoing neurological rehabilitation. <i>Ann</i> . 2008;11(4):225-230.                                                                                                                    | 10/10          |
| 169             | Hagen EM, Grimstad KE, Bovim L, Gronning M. Patients with traumatic spinal cord injuries and their satisfaction with their general practitioner. <i>Spinal Cord</i> . 2012;50(7):527-532.                                                                                                                            | 4/4            |
| 170             | Hagen EM, Rekand T, Gilhus NE, Gronning M. Traumatic spinal cord injuries-- incidence, mechanisms and course. <i>Tidsskr Nor Laegeforen</i> . 2012;132(7):831-837.                                                                                                                                                   | 4/4            |
| 171             | Hajiaghababaei M, Javidan AN, Saberi H, et al. Female sexual dysfunction in patients with spinal cord injury: a study from Iran. <i>Spinal Cord</i> . 2014;52(8):646-649.                                                                                                                                            | 2/2            |
| 172             | Hammell KW, Miller WC, Forwell SJ, Forman BE, Jacobsen BA. Fatigue and spinal cord injury: a qualitative analysis. <i>Spinal Cord</i> . 2009;47(1):44-49.                                                                                                                                                            | 4/4            |
| 173             | Hampton NZ, Qin-Hilliard DB. Dimensions of quality of life for Chinese adults with spinal cord injury: a qualitative study. <i>Disabil Rehabil</i> . 2004;26(4):203-212.                                                                                                                                             | 4/4            |
| 174             | Hancock K, Craig A, Tennant C, Chang E. The influence of spinal cord injury on coping styles and self-perceptions: a controlled study. <i>Aust N Z J Psychiatry</i> . 1993;27(3):450-456.                                                                                                                            | 4/4            |
| 175             | Hancock KM, Craig AR, Dickson HG, Chang E, Martin J. Anxiety and depression over the first year of spinal cord injury: a longitudinal study. <i>Paraplegia</i> . 1993;31(6):349-357.                                                                                                                                 | 10/10          |
| 176             | Hanley MA, Raichle K, Jensen M, Cardenas DD. Pain catastrophizing and beliefs predict changes in pain interference and psychological functioning in persons with spinal cord injury. <i>The Journal of Pain</i> . 2008;9(9):863-871.                                                                                 | 10/10          |
| 177             | Hanover J. What are the assessment components for SCI patients pertaining to evaluation of substance abuse? <i>SCI Nurs</i> . 1990;7(2):38.                                                                                                                                                                          | 7/7            |
| 178             | Haran MJ, Lee BB, King MT, Marial O, Stockler MR. Health status rated with the Medical Outcomes Study 36-Item Short-Form Health Survey after spinal cord injury. <i>Arch Phys Med Rehabil</i> . 2005;86(12):2290-2295.                                                                                               | 10/10          |
| 179             | Harper LA, Coleman JA, Perrin PB, et al. Comparison of mental health between individuals with spinal cord injury and able-bodied controls in Neiva, Colombia. <i>Journal of rehabilitation research and development</i> . 2014;51(1):127-136.                                                                        | 2/2            |
| 180             | Harris EC, Barraclough BM, Grundy DJ, Bamford ES, Inskip HM. Attempted suicide and completed suicide in traumatic spinal cord injury. <i>Case reports</i> . <i>Spinal Cord</i> . 1996;34(12):752-753.                                                                                                                | 6/6            |
| 181             | Harrison J, Glass CA, Owens RG, Soni BM. Factors associated with sexual functioning in women following spinal cord injury. <i>Paraplegia</i> . 1995;33(12):687-692.                                                                                                                                                  | 10/10          |
| 182             | Hart KA, Rintala DH, Fuhrer MJ. Educational interests of individuals with spinal cord injury living in the community: medical, sexuality, and wellness topics. <i>Rehabil Nurs</i> . 1996;21(2):82-90.                                                                                                               | 4/4            |
| 183             | Hartkopp A, Bronnum-Hansen H, Seidenschnur AM, Biering-Sorensen F. Suicide in a spinal cord injured population: its relation to functional status. <i>Arch Phys Med Rehabil</i> . 1998;79(11):1356-1361.                                                                                                             | 10/10          |
| 184             | Hartkopp PA, Bronnum-Hansen H, Seidenschnur AM, Biering-Sorensen F. [Survival and cause of death after traumatic spinal cord injury. A long-term epidemiological study]. <i>Ugeskr Laeger</i> . 1998;160(43):6207-6210.                                                                                              | 8/8            |
| 185             | Harvey JR, Bradley MB, Aronica MJ. Psychological effects of functional electrical stimulation: A review of the literature. <i>Journal of Neurologic Rehabilitation</i> . 1992;6(4):203-211.                                                                                                                          | 11/11          |
| 186             | Hassanjirdehi M, Khak M, Afshari-Mirak S, et al. Evaluation of pain and its effect on quality of life and functioning in men with spinal cord injury. <i>Korean J Pain</i> . 2015;28(2):129-136.                                                                                                                     | 10/10          |
| 187             | Hausmann LR, Myaskovsky L, Niyonkuru C, et al. Examining implicit bias of physicians who care for individuals with spinal cord injury: A pilot study and future directions. <i>Journal of Spinal Cord Medicine</i> . 2015;38(1):102-110.                                                                             | 4/4            |
| 188             | Hayes RL, Potter CG, Hardin C. Counseling the client on wheels: A primer for mental health counselors new to spinal cord injury. <i>Journal of Mental Health Counseling</i> . 1995;17(1):18-30.                                                                                                                      | 7/7            |
| 189             | Heinemann A, Williams RT, Wilson CS, et al. Evaluating the psychometric properties of depression measures in persons with SCI and major depressive disorder. <i>Archives of physical medicine and rehabilitation</i> . 94(10):e20-e21.                                                                               | 7/7            |
| 190             | Heinemann AW, Doll MD, Armstrong KJ, Schnoll S, Yarkony GM. Substance use and receipt of treatment by persons with long-term spinal cord injuries. <i>Arch Phys Med Rehabil</i> . 1991;72(7):482-487.                                                                                                                | 10/10          |

*Continued*

*Continued*

| Citation Number | Citation                                                                                                                                                                                                                                                                                | Exclusion Code |
|-----------------|-----------------------------------------------------------------------------------------------------------------------------------------------------------------------------------------------------------------------------------------------------------------------------------------|----------------|
| 191             | Heinemann AW, Hawkins D. Substance abuse and medical complications following spinal cord injury. <i>Rehabilitation Psychology</i> . 1995;40(2):125-140.                                                                                                                                 | 10/10          |
| 192             | Heinemann AW, Keen M, Donohue R, Schnoll S. Alcohol use by persons with recent spinal cord injury. <i>Arch Phys Med Rehabil</i> . 1988;69(8):619-624.                                                                                                                                   | 10/10          |
| 193             | Heinemann AW, McGraw TE, Brandt MJ, Roth E, Dell'Oliver C. Prescription medication misuse among persons with spinal cord injuries. <i>Int J Addict</i> . 1992;27(3):301-316.                                                                                                            | 10/10          |
| 194             | Heinemann AW, Schnoll S, Brandt M, Maltz R, Keen M. Toxicology screening in acute spinal cord injury. <i>Alcohol Clin Exp Res</i> . 1988;12(6):815-819.                                                                                                                                 | 4/4            |
| 195             | Heinrich RK, Tate DG. Latent variable structure of the Brief Symptom Inventory in a sample of persons with spinal cord injuries. <i>Rehabilitation Psychology</i> . 1996;41(2):131-147.                                                                                                 | 2/2            |
| 196             | Herrick SM, Elliott TR, Crow F. Social support and the prediction of health complications among persons with spinal cord injuries. <i>Rehabilitation Psychology</i> . 1994;39(4):231-250.                                                                                               | 13/13          |
| 197             | Heutink M, Post MW, Bongers-Janssen HM, et al. The CONECSE trial: results of a randomized controlled trial of a multidisciplinary cognitive behavioral program for coping with chronic neuropathic pain after spinal cord injury. <i>Pain</i> . 2012;153(1):120-128.                    | 4/4            |
| 198             | Heutink M, Post MW, Luthart P, Pfenning LE, Dijkstra CA, Lindeman E. A multidisciplinary cognitive behavioural programme for coping with chronic neuropathic pain following spinal cord injury: the protocol of the CONECSE trial. <i>BMC neurology</i> . 2010;10(96).                  | 7/7            |
| 199             | Heutink M, Post MWM, Bongers-Janssen HMH, et al. The conecsi trial: A randomized controlled trial of a multidisciplinary cognitive behavioral program for coping with chronic neuropathic spinal cord injury pain. <i>Topics in spinal cord injury rehabilitation</i> . 2011;16:29-30.  | 13/13          |
| 200             | Hicken BL, Putzke JD, Richards JS. Bladder management and quality of life after spinal cord injury. <i>Am J Phys Med Rehabil</i> . 2001;80(12):916-922.                                                                                                                                 | 10/10          |
| 201             | Hitzig SL, Tonack M, Campbell KA, et al. Secondary health complications in an aging Canadian spinal cord injury sample. <i>Am J Phys Med Rehabil</i> . 2008;87(7):545-555.                                                                                                              | 10/10          |
| 202             | Hopkins MT. Patterns of self-destruction among the orthopedically disabled. <i>Rehabilitation Research &amp; Practice Review</i> . 1971;3(1):5-16.                                                                                                                                      | 7/7            |
| 203             | Horn SD, Smout RJ, DeJong G, et al. Association of various comorbidity measures with spinal cord injury rehabilitation outcomes. <i>Arch Phys Med Rehabil</i> . 2013;94(4 Suppl):S75-86.                                                                                                | 4/4            |
| 204             | Horner-Johnson W, Krahn GL, Suzuki R, et al. Differential performance of SF-36 items in healthy adults with and without functional limitations. <i>Arch Phys Med Rehabil</i> . 2010;91(4):570-575.                                                                                      | 4/4            |
| 205             | Horvat M, French R, Henschen K. A comparison of the psychological characteristics of male and female able-bodied and wheelchair athletes. <i>Paraplegia</i> . 1986;24(2):115-122.                                                                                                       | 4/4            |
| 206             | Hossain MS, Rahman MA, Bowden JL, Quadir MM, Herbert RD, Harvey LA. Psychological and socioeconomic status, complications and quality of life in people with spinal cord injuries after discharge from hospital in Bangladesh: a cohort study. <i>Spinal Cord</i> . 2016;54(6):483-489. | 2/2            |
| 207             | Hough S, Stone MT, Buse DC. Dating and relationship psychoeducational group for veterans with spinal cord injury/dysfunction: A historical account of an initial clinical course. <i>Sexuality and Disability</i> . 2013;31(4):337-359.                                                 | 4/4            |
| 208             | Hough S. Depression after spinal cord injury and medication: The journey continues. <i>Journal of Spinal Cord Medicine</i> . 2014;37(3):246.                                                                                                                                            | 7/7            |
| 209             | Houlihan BV, Jette A, Ni P, et al. Efficacy of "care call" telerehabilitation intervention for persons with spinal cord dysfunction: Randomized controlled trial. <i>Archives of physical medicine and rehabilitation</i> . 92(10):1690.                                                | 7/7            |
| 210             | Huang CY, Chen WK, Lu CY, et al. Mediating effects of social support and self-concept on depressive symptoms in adults with spinal cord injury. <i>Spinal Cord</i> . 2015;53(5):413-416.                                                                                                | 4/4            |
| 211             | Hui S-kA, Elliott TR, Shewchuk R, Rivera P. Communal behaviors and psychological adjustment of family caregivers and persons with spinal cord injury. <i>Rehabilitation Psychology</i> . 2007;52(1):113-119.                                                                            | 10/10          |
| 212             | Hultling C, Giuliano F, Quirk F, Pena B, Mishra A, Smith MD. Quality of life in patients with spinal cord injury receiving Viagra (sildenafil citrate) for the treatment of erectile dysfunction. <i>Spinal cord</i> . 2000;38(6):363-370.                                              | 2/2            |
| 213             | Hunter Revell SM. Symptom clusters in traumatic spinal cord injury: an exploratory literature review. <i>J Neurosci Nurs</i> . 2011;43(2):85-93.                                                                                                                                        | 4/4            |
| 214             | Huston T, Gassaway J, Wilson C, Gordon S, Koval J, Schwebel A. The SCIREhab project: treatment time spent in SCI rehabilitation. Psychology treatment time during inpatient spinal cord injury rehabilitation. <i>Journal of Spinal Cord Medicine</i> . 2011;34(2):196-204.             | 4/4            |
| 215             | Imai K, Kadowaki T, Aizawa Y. Standardized indices of mortality among persons with spinal cord injury: accelerated aging process. <i>Ind Health</i> . 2004;42(2):213-218.                                                                                                               | 4/4            |
| 216             | Jacob KS, Zachariah K, Bhattacharji S. Depression in individuals with spinal cord injury: methodological issues. <i>Paraplegia</i> . 1995;33(7):377-380.                                                                                                                                | 7/7            |
| 217             | Jamous A, Kennedy P, Grey N. Psychological and emotional effects of the use of oral baclofen: A preliminary study. <i>Paraplegia</i> . 1994;32(5):349-353.                                                                                                                              | 10/10          |

*Continued*



**Continued**

| Citation Number | Citation                                                                                                                                                                                                                                                                   | Exclusion Code |
|-----------------|----------------------------------------------------------------------------------------------------------------------------------------------------------------------------------------------------------------------------------------------------------------------------|----------------|
| 218             | January AM, Zebracki K, Chlan KM, Vogel LC. Understanding post-traumatic growth following pediatric-onset spinal cord injury: the critical role of coping strategies for facilitating positive psychological outcomes. <i>Dev Med Child Neurol.</i> 2015;57(12):1143-1149. | 13/13          |
| 219             | Jensen MP, Hirsh AT, Molton IR, Bamer AM. Sleep problems in individuals with spinal cord injury: frequency and age effects. <i>Rehabilitation Psychology.</i> 2009;54(3):323-331.                                                                                          | 4/4            |
| 220             | Jensen MP, Hoffman AJ, Cardenas DD. Chronic pain in individuals with spinal cord injury: a survey and longitudinal study. <i>Spinal Cord.</i> 2005;43(12):704-712.                                                                                                         | 13/13          |
| 221             | Jensen MP, Kuehn CM, Amtmann D, Cardenas DD. Symptom burden in persons with spinal cord injury. <i>Arch Phys Med Rehabil.</i> 2007;88(5):638-645.                                                                                                                          | 13/13          |
| 222             | Jensen MP, Moore MR, Bockow TB, Ehde DM, Engel JM. Psychosocial factors and adjustment to chronic pain in persons with physical disabilities: a systematic review. <i>Arch Phys Med Rehabil.</i> 2011;92(1):146-160.                                                       | 11/11          |
| 223             | Jiao J, Heyne MM, Lam CS. Acceptance of disability among Chinese individuals with spinal cord injuries: The effects of social support and depression. <i>Psychology.</i> 2012;3(9A):775-781.                                                                               | 13/13          |
| 224             | Joerres SG, Bonifay RE, Hastings JE, Saltzstein RJ, Hayes TJ. Seasonal affective disorder in a spinal cord injury population. <i>J Am Paraplegia Soc.</i> 1992;15(2):66-70.                                                                                                | 10/10          |
| 225             | Johnson RL, Gerhart KA, McCray J, Menconi JC, Whiteneck GG. Secondary conditions following spinal cord injury in a population-based sample. <i>Spinal Cord.</i> 1998;36(1):45-50.                                                                                          | 10/10          |
| 226             | Johnstone B, Yoon DP. Relationships between the Brief Multidimensional Measure of Religiousness/Spirituality and health outcomes for a heterogeneous rehabilitation population. <i>Rehabilitation Psychology.</i> 2009;54(4):422-431.                                      | 10/10          |
| 227             | Judd FK, Brown DJ, Burrows GD. Depression, disease and disability: application to patients with traumatic spinal cord injury. <i>Paraplegia.</i> 1991;29(2):91-96.                                                                                                         | 11/11          |
| 228             | Judd FK, Brown DJ. Psychiatric consultation in a spinal injuries unit. <i>Australian and New Zealand Journal of Psychiatry.</i> 1992;26(2):218-222.                                                                                                                        | 10/10          |
| 229             | Judd FK, Brown DJ. Psychiatry in the spinal injuries unit. <i>Paraplegia.</i> 1987;25(3):254-257.                                                                                                                                                                          | 7/7            |
| 230             | Judd FK, Brown DJ. Suicide following acute traumatic spinal cord injury. <i>Paraplegia.</i> 1992;30(3):173-177.                                                                                                                                                            | 7/7            |
| 231             | Judd FK, Burrows GD, Brown DJ. Depression following acute spinal cord injury. <i>Paraplegia.</i> 1986;24(6):358-363.                                                                                                                                                       | 10/10          |
| 232             | Judd FK, Stone J, Webber JE, Brown DJ, Burrows G. Depression following spinal cord injury: A prospective in-patient study. <i>The British Journal of Psychiatry.</i> 1989;154:668-671.                                                                                     | 10/10          |
| 233             | Judd LL, Kunovac JL. Clinical characteristics and management of unipolar depressive disorders comorbid with neurological disorders. <i>Neuropsychobiology.</i> 1998;37(2):84-87.                                                                                           | 6/6            |
| 234             | Jurisc B, Marusic A. Suicidal ideation and behavior and some psychological correlates in physically disabled motor-vehicle accident survivors. <i>Crisis.</i> 2009;30(1):34-38.                                                                                            | 10/10          |
| 235             | Kalpakjian CZ, McCullumsmith CB, Fann JR, et al. Post-traumatic growth following spinal cord injury. <i>Journal of Spinal Cord Medicine.</i> 2014;37(2):218-225.                                                                                                           | 4/4            |
| 236             | Kalpakjian CZ, Toussaint LL, Albright KJ, Bombardier CH, Krause JK, Tate DG. Patient health Questionnaire-9 in spinal cord injury: an examination of factor structure as related to gender. <i>Journal of Spinal Cord Medicine.</i> 2009;32(2):147-156.                    | 4/4            |
| 237             | Kannisto M, Sintonen H. Later health-related quality of life in adults who have sustained spinal cord injury in childhood. <i>Spinal Cord.</i> 1997;35(11):747-751.                                                                                                        | 10/10          |
| 238             | Karimzadeh M, Salsabili N, Akbariasbagh F, Mehraei A. The psychological impact of infertility in the male able bodied and spinal cord injured population. <i>Sexuality and Disability.</i> 2006;24(4):185-193.                                                             | 10/10          |
| 239             | Katz V, Gordon R, Iversen D, Myers SJ. Past history and degree of depression in paraplegic individuals. <i>Paraplegia.</i> 1978;16(1):8-14.                                                                                                                                | 10/10          |
| 240             | Kavussanu M, Ring C, Kavanagh J. Antisocial behavior, moral disengagement, empathy and negative emotion: A comparison between disabled and able-bodied athletes. <i>Ethics &amp; Behavior.</i> 2015;25(4):297-306.                                                         | 10/10          |
| 241             | Kawar JS, Sayegh HI, Shougah D, Tayseer F. Depression following spinal cord injury among Jordanian patients. <i>Arab Journal of Psychiatry.</i> 1998;9(2):79-83.                                                                                                           | 7/7            |
| 242             | Kemp BJ, Kahan JS, Krause JS, Adkins RH, Nava G. Treatment of major depression in individuals with spinal cord injury. <i>Journal of Spinal Cord Medicine.</i> 2004;27(1):22-28.                                                                                           | 13/13          |
| 243             | Kemp BJ, Krause JS. Depression and life satisfaction among people ageing with post-polio and spinal cord injury. <i>Disabil Rehabil.</i> 1999;21(5-6):241-249.                                                                                                             | 4/4            |
| 244             | Kemp BJ, Spungen AM, Adkins RH, Krause JS, Bauman WA. The relationships among serum lipid levels, adiposity, and depressive symptomatology in persons aging with spinal cord injury. <i>Journal of Spinal Cord Medicine.</i> 2000;23(4):216-220.                           | 4/4            |
| 245             | Kennedy P, Duff J, Evans M, Beedie A. Coping effectiveness training reduces depression and anxiety following traumatic spinal cord injuries. <i>The British journal of clinical psychology / the British Psychological Society.</i> 2003;42(Pt 1):41-52.                   | 13/13          |
| 246             | Kennedy P, Duff J. Post traumatic stress disorder and spinal cord injuries. <i>Spinal Cord.</i> 2001;39(1):1-10.                                                                                                                                                           | 11/11          |

*Continued*

*Continued*

| Citation Number | Citation                                                                                                                                                                                                                                                  | Exclusion Code |
|-----------------|-----------------------------------------------------------------------------------------------------------------------------------------------------------------------------------------------------------------------------------------------------------|----------------|
| 247             | Kennedy P, Evans M, Sandhu N. Psychological adjustment to spinal cord injury: the contribution of coping, hope and cognitive appraisals. <i>Psychol Health Med</i> . 2009;14(1):17-33.                                                                    | 13/13          |
| 248             | Kennedy P, Evans MJ. Evaluation of post traumatic distress in the first 6 months following SCI. <i>Spinal Cord</i> . 2001;39(7):381-386.                                                                                                                  | 2/2            |
| 249             | Kennedy P, Kilvert A, Hasson L. A 21-year longitudinal analysis of impact, coping, and appraisals following spinal cord injury. <i>Rehabilitation Psychology</i> . 2016;61(1):92-101.                                                                     | 10/10          |
| 250             | Kennedy P, Lowe R, Grey N, Short E. Traumatic spinal cord injury and psychological impact: A cross-sectional analysis of coping strategies. <i>Br J Clin Psychol</i> . 1995;34(4):627-639.                                                                | 2/2            |
| 251             | Kennedy P, Lude P, Elfstrom ML, Smithson E. Sense of coherence and psychological outcomes in people with spinal cord injury: appraisals and behavioural responses. <i>Br J Health Psychol</i> . 2010;15(Pt 3):611-621.                                    | 13/13          |
| 252             | Kennedy P, Lude P, Elfstrom ML, Smithson EF. Psychological contributions to functional independence: a longitudinal investigation of spinal cord injury rehabilitation. <i>Arch Phys Med Rehabil</i> . 2011;92(4):597-602.                                | 4/4            |
| 253             | Kennedy P, Marsh N, Lowe R, Grey N, Short E, Rogers B. A longitudinal analysis of psychological impact and coping strategies following spinal cord injury. <i>Br J Health Psychol</i> . 2000;5(Part2):157-172.                                            | 13/13          |
| 254             | Kennedy P, Rogers BA. Anxiety and depression after spinal cord injury: a longitudinal analysis. <i>Arch Phys Med Rehabil</i> . 2000;81(7):932-937.                                                                                                        | 13/13          |
| 255             | Kennedy P, Taylor NM, Duff J. Characteristics Predicting Effective Outcomes After Coping Effectiveness Training for Patients With Spinal Cord Injuries. <i>Journal of Clinical Psychology in Medical Settings</i> . 2005;12(1):93-98.                     | 10/10          |
| 256             | Kennedy P. Coping effectively with spinal cord injuries: A group program : Therapist guide. <i>Treatments that work</i> . 2009.                                                                                                                           | 2/2            |
| 257             | Khazaeipour Z, Norouzi-Javidan A, Kaveh M, Khanzadeh Mehrabani F, Kazazi E, Emami-Razavi SH. Psychosocial outcomes following spinal cord injury in Iran. <i>Journal of Spinal Cord Medicine</i> . 2014;37(3):338-345.                                     | 2/2            |
| 258             | Khazaeipour Z, Taheri-Otaghsara SM, Naghdi M. Depression Following Spinal Cord Injury: Its Relationship to Demographic and Socioeconomic Indicators. <i>Topics in Spinal Cord Injury Rehabilitation</i> . 2015;21(2):149-155.                             | 2/2            |
| 259             | Kilic SA, Dorstyn DS, Guiver NG. Examining factors that contribute to the process of resilience following spinal cord injury. <i>Spinal Cord</i> . 2013;51(7):553-557.                                                                                    | 10/10          |
| 260             | Kim SP, Davis SW, Sell GH. Amitriptyline in severely depressed spinal cord-injured patients: rapidity of response. <i>Arch Phys Med Rehabil</i> . 1977;58(4):157-161.                                                                                     | 10/10          |
| 261             | King C, Kennedy P. Coping effectiveness training for people with spinal cord injury: preliminary results of a controlled trial. <i>The British journal of clinical psychology / the British Psychological Society</i> . 1999;38(Pt 1):5-14.               | 10/10          |
| 262             | Kirubakaran VR, Kumar VN, Powell BJ, Tyler AJ, Armatas PJ. Survey of alcohol and drug misuse in spinal cord injured veterans. <i>Journal of Studies on Alcohol</i> . 1986;47(3):223-227.                                                                  | 10/10          |
| 263             | Kisala PA, Tulsy DS, Kalpakjian CZ, et al. Measuring anxiety after spinal cord injury: Development and psychometric characteristics of the SCI-QOL Anxiety item bank and linkage with GAD-7. <i>Journal of Spinal Cord Medicine</i> . 2015;38(3):315-325. | 4/4            |
| 264             | Kishi Y, Robinson RG, Forrester AW. Comparison between acute and delayed onset major depression after spinal cord injury. <i>J Nerv Ment Dis</i> . 1995;183(5):286-292.                                                                                   | 10/10          |
| 265             | Kishi Y, Robinson RG, Forrester AW. Prospective longitudinal study of depression following spinal cord injury. <i>J Neuropsychiatry Clin Neurosci</i> . 1994;6(3):237-244.                                                                                | 10/10          |
| 266             | Kishi Y, Robinson RG, Kosier JT. Suicidal ideation among patients during the rehabilitation period after life-threatening physical illness. <i>J Nerv Ment Dis</i> . 2001;189(9):623-628.                                                                 | 5/5            |
| 267             | Kishi Y, Robinson RG, Kosier JT. Suicidal ideation among patients with acute life-threatening physical illness: patients with stroke, traumatic brain injury, myocardial infarction, and spinal cord injury. <i>Psychosomatics</i> . 2001;42(5):382-390.  | 5/5            |
| 268             | Kishi Y, Robinson RG. Suicidal plans following spinal cord injury: a six month study. <i>J Neuropsychiatry Clin Neurosci</i> . 1996;8(4):442-445.                                                                                                         | 13/13          |
| 269             | Kivisild A, Sabre L, Tomberg T, et al. Health-related quality of life in patients with traumatic spinal cord injury in Estonia. <i>Spinal Cord</i> . 2014;52(7):570-575.                                                                                  | 2/2            |
| 270             | Kiwierski J, Weiss M, Chrostowska T. Analysis of mortality of patients after cervical spine trauma. <i>Paraplegia</i> . 1981;19(6):347-351.                                                                                                               | 4/4            |
| 271             | Kiwierski JE, Krasuski M. Influence of alcohol intake on the course and consequences of spinal cord injury. <i>International Journal of Rehabilitation Research</i> . 1992;15(3):240-245.                                                                 | 4/4            |
| 272             | Klyce DW, Bombardier CH, Davis TJ, et al. Distinguishing grief from depression during acute recovery from spinal cord injury. <i>Arch Phys Med Rehabil</i> . 2015;96(8):1419-1425.                                                                        | 4/4            |
| 273             | Kohut RM, Seftel AD, Ducharme SH, Fogel BS, Bodner DR. Sexual and psychological aspects of rehabilitation after spinal cord injury. <i>Psychiatric care of the medical patient</i> . 2015:1504-1526.                                                      | 6/6            |

*Continued*

**Continued**

| Citation Number | Citation                                                                                                                                                                                                                                                                                                                                                       | Exclusion Code |
|-----------------|----------------------------------------------------------------------------------------------------------------------------------------------------------------------------------------------------------------------------------------------------------------------------------------------------------------------------------------------------------------|----------------|
| 274             | Kolakowsky-Hayner SA, Gourley EV, 3rd, Kreutzer JS, Marwitz JH, Meade MA, Cifu DX. Post-injury substance abuse among persons with brain injury and persons with spinal cord injury. <i>Brain Inj.</i> 2002;16(7):583-592.                                                                                                                                      | 10/10          |
| 275             | Kooijmans H, Post M, van der Woude L, de Groot S, Stam H, Bussmann J. Randomized controlled trial of a self-management intervention in persons with spinal cord injury: Design of the HABITS (Healthy Active Behavioural Intervention in SCI) study. <i>Disability and Rehabilitation: An International, Multidisciplinary Journal.</i> 2013;35(13):1111-1118. | 7/7            |
| 276             | Kortte KB, Gilbert M, Gorman P, Wegener ST. Positive psychological variables in the prediction of life satisfaction after spinal cord injury. <i>Rehabilitation Psychology.</i> 2010;55(1):40-47.                                                                                                                                                              | 13/13          |
| 277             | Kraft R, Dorstyn D. Psychosocial correlates of depression following spinal injury: A systematic review. <i>Journal of Spinal Cord Medicine.</i> 2015;38(5):571-583.                                                                                                                                                                                            | 4/4            |
| 278             | Kratz AL, Hirsh AT, Ehde DM, Jensen MP. Acceptance of pain in neurological disorders: associations with functioning and psychosocial well-being. <i>Rehabilitation Psychology.</i> 2013;58(1):1-9.                                                                                                                                                             | 4/4            |
| 279             | Krause J, Rohe DE. Personality and life adjustment after spinal cord injury: An exploratory study. <i>Rehabilitation Psychology.</i> 1998;43(2):118-130.                                                                                                                                                                                                       | 13/13          |
| 280             | Krause JS, Bombardier C, Carter RE. Assessment of depressive symptoms during inpatient rehabilitation for spinal cord injury: Is there an underlying somatic factor when using the PHQ? <i>Rehabilitation Psychology.</i> 2008;53(4):513-520.                                                                                                                  | 4/4            |
| 281             | Krause JS, Broderick LE, Saladin LK, Broyles J. Racial disparities in health outcomes after spinal cord injury: mediating effects of education and income. <i>Journal of Spinal Cord Medicine.</i> 2006;29(1):17-25.                                                                                                                                           | 4/4            |
| 282             | Krause JS, Brotherton SS, Morrisette DC, Newman SD, Karakostas TE. Does pain interference mediate the relationship of independence in ambulation with depressive symptoms after spinal cord injury? <i>Rehabilitation Psychology.</i> 2007;52(2):162-169.                                                                                                      | 4/4            |
| 283             | Krause JS, Carter R, Zhai Y, Reed K. Psychologic factors and risk of mortality after spinal cord injury. <i>Arch Phys Med Rehabil.</i> 2009;90(4):628-633.                                                                                                                                                                                                     | 4/4            |
| 284             | Krause JS, Coker J, Charlifue S, Whiteneck GG. Health behaviors among American Indians with spinal cord injury: comparison with data from the 1996 Behavioral Risk Factor Surveillance System. <i>Arch Phys Med Rehabil.</i> 1999;80(11):1435-1440.                                                                                                            | 10/10          |
| 285             | Krause JS, Edles PA. Injury perceptions, hope for recovery, and psychological status after spinal cord injury. <i>Rehabilitation Psychology.</i> 2014;59(2):176-182.                                                                                                                                                                                           | 2/2            |
| 286             | Krause JS, Kjorsvig JM. Mortality after spinal cord injury: a four-year prospective study.[Erratum appears in <i>Arch Phys Med Rehabil</i> 1992 Aug;73(8):716]. <i>Arch Phys Med Rehabil.</i> 1992;73(6):558-563.                                                                                                                                              | 4/4            |
| 287             | Krause JS, McArdle JJ, Pickelsimer E, Reed KS. A latent variable structural path model of health behaviors after spinal cord injury. <i>Journal of Spinal Cord Medicine.</i> 2009;32(2):162-174.                                                                                                                                                               | 4/4            |
| 288             | Krause JS, Reed KS, McArdle JJ. A structural analysis of health outcomes after spinal cord injury. <i>Journal of Spinal Cord Medicine.</i> 2010;33(1):22-32.                                                                                                                                                                                                   | 4/4            |
| 289             | Krause JS, Reed KS, McArdle JJ. Factor structure and predictive validity of somatic and nonsomatic symptoms from the patient health questionnaire-9: a longitudinal study after spinal cord injury. <i>Arch Phys Med Rehabil.</i> 2010;91(8):1218-1224.                                                                                                        | 4/4            |
| 290             | Krause JS, Reed KS, McArdle JJ. Prediction of somatic and non-somatic depressive symptoms between inpatient rehabilitation and follow-up. <i>Spinal Cord.</i> 2010;48(3):239-244.                                                                                                                                                                              | 10/10          |
| 291             | Krause JS, Saunders LL, Bombardier C, Kalpakjian C. Confirmatory factor analysis of the Patient Health Questionnaire-9: a study of the participants from the spinal cord injury model systems. <i>Pm R.</i> 2011;3(6):533-540; quiz 540.                                                                                                                       | 4/4            |
| 292             | Krause JS, Vines CL, Farley TL, Sniezek J, Coker J. An exploratory study of pressure ulcers after spinal cord injury: relationship to protective behaviors and risk factors. <i>Arch Phys Med Rehabil.</i> 2001;82(1):107-113.                                                                                                                                 | 4/4            |
| 293             | Krause JS, Zhai Y, Saunders LL, Carter RE. Risk of mortality after spinal cord injury: an 8-year prospective study. <i>Arch Phys Med Rehabil.</i> 2009;90(10):1708-1715.                                                                                                                                                                                       | 13/13          |
| 294             | Krause JS. Factors associated with risk for subsequent injuries after traumatic spinal cord injury. <i>Arch Phys Med Rehabil.</i> 2004;85(9):1503-1508.                                                                                                                                                                                                        | 4/4            |
| 295             | Kreuter M, Sullivan M, Dahllof AG, Siosteen A. Partner relationships, functioning, mood and global quality of life in persons with spinal cord injury and traumatic brain injury. <i>Spinal cord.</i> 1998;36(4):252-261.                                                                                                                                      | 2/2            |
| 296             | Kunz S, Joseph S, Geyh S, Peter C. Posttraumatic Growth and Adjustment to Spinal Cord Injury: Moderated by Posttraumatic Depreciation? <i>Psychological Trauma: Theory, Research, Practice, and Policy.</i> 2016:No Pagination Specified.                                                                                                                      | 2/2            |
| 297             | Kuptniratsaikul V, Chulakadabba S, Ratanavijitrasil S. An instrument for assessment of depression among spinal cord injury patients: comparison between the CES-D and TDI. <i>J Med Assoc Thai.</i> 2002;85(9):978-983.                                                                                                                                        | 2/2            |

*Continued*

*Continued*

| Citation Number | Citation                                                                                                                                                                                                                                     | Exclusion Code |
|-----------------|----------------------------------------------------------------------------------------------------------------------------------------------------------------------------------------------------------------------------------------------|----------------|
| 298             | Kuptniratsaikul V, Smerasuta O, Klomjaiyen P. The perceived handicap questionnaire: a self perceived handicap measurement in patients with spinal cord injury. <i>J Med Assoc Thai.</i> 2002;85(8):935-939.                                  | 10/10          |
| 299             | Kuptniratsaikul V. Epidemiology of spinal cord injuries: a study in the Spinal Unit, Siriraj Hospital, Thailand, 1997-2000. <i>J Med Assoc Thai.</i> 2003;86(12):1116-1121.                                                                  | 10/10          |
| 300             | Laatsch L, Shahani BT. The relationship between age, gender and psychological distress in rehabilitation inpatients. <i>Disability and Rehabilitation: An International, Multidisciplinary Journal.</i> 1996;18(12):604-608.                 | 10/10          |
| 301             | Lamid S, Chia JK, Kohli A, Cid E. Chronic pain in spinal cord injury: comparison between inpatients and outpatients. <i>Arch Phys Med Rehabil.</i> 1985;66(11):777-778.                                                                      | 4/4            |
| 302             | Le J, Dorstyn D. Anxiety prevalence following spinal cord injury: a meta-analysis. <i>Spinal Cord.</i> 2016;54(8):626.                                                                                                                       | 7/7            |
| 303             | Levy LF, Makarawo S, Madzivire D, Bhebhe E, Verbeek N, Parry O. Problems, struggles and some success with spinal cord injury in Zimbabwe. <i>Spinal Cord.</i> 1998;36(3):213-218.                                                            | 4/4            |
| 304             | Lidal IB, Veenstra M, Hjeltnes N, Biering-Sorensen F. Health-related quality of life in persons with long-standing spinal cord injury.[Erratum appears in <i>Spinal Cord.</i> 2008 Nov;46(11):765]. <i>Spinal Cord.</i> 2008;46(11):710-715. | 2/2            |
| 305             | Liu S, Wang L, Cao C, Zhang J. The factor structure of posttraumatic stress disorder symptoms in patients with traumatic spinal cord injuries. <i>Arch Psychiatr Nurs.</i> 2014;28(5):301-304.                                               | 4/4            |
| 306             | Livneh H, Antonak RF. Temporal structure of adaptation to disability. <i>Rehabilitation Counseling Bulletin.</i> 1991;34(4):298-319.                                                                                                         | 4/4            |
| 307             | Livneh H, Martz E, Bodner T. Psychosocial Adaptation to Chronic Illness and Disability: A Preliminary Study of its Factorial Structure. <i>Journal of Clinical Psychology in Medical Settings.</i> 2006;13(3):251-261.                       | 2/2            |
| 308             | Livneh H, Martz E. Coping strategies and resources as predictors of psychosocial adaptation among people with spinal cord injury. <i>Rehabilitation Psychology.</i> 2014;59(3):329-339.                                                      | 10/10          |
| 309             | Livneh H, Martz E. Psychosocial adaptation to spinal cord injury as a function of time since injury. <i>International Journal of Rehabilitation Research.</i> 2003;26(3):191-200.                                                            | 4/4            |
| 310             | Livneh H, Martz E. The impact of perceptions of health control and coping modes on negative affect among individuals with spinal cord injuries. <i>Journal of Clinical Psychology in Medical Settings.</i> 2011;18(3):243-256.               | 10/10          |
| 311             | Lohne V. The incomprehensible injury--interpretations of patients' narratives concerning experiences with an acute and dramatic spinal cord injury. <i>Scand J Caring Sci.</i> 2009;23(1):67-75.                                             | 6/6            |
| 312             | Lude P, Kennedy P, Evans M, Lude Y, Beedie A. Post traumatic distress symptoms following spinal cord injury: a comparative review of European samples. <i>Spinal Cord.</i> 2005;43(2):102-108.                                               | 10/10          |
| 313             | Lundqvist C, Siosteen A, Blomstrand C, Lind B, Sullivan M. Spinal cord injuries. Clinical, functional, and emotional status. <i>Spine.</i> 1991;16(1):78-83.                                                                                 | 4/4            |
| 314             | Lynch KB, Bridle MJ. Construct validity of the Occupational Performance History Interview. <i>Occupational Therapy Journal of Research.</i> 1993;13(4):231-240.                                                                              | 2/2            |
| 315             | Lyons JS, Larson DB, Burns BJ, Cope N, Wright S, Hammer JS. Psychiatric co-morbidities and patients with head and spinal cord trauma. Effects on acute hospital care. <i>Gen Hosp Psychiatry.</i> 1988;10(4):292-297.                        | 4/4            |
| 316             | MacDonald MR, Nielson WR, Cameron MG. Depression and activity patterns of spinal cord injured persons living in the community. <i>Arch Phys Med Rehabil.</i> 1987;68(6):339-343.                                                             | 10/10          |
| 317             | Mackenzie TB, Popkin MK. Suicide in the medical patient. <i>Int J Psychiatry Med.</i> 1987;17(1):3-22.                                                                                                                                       | 7/7            |
| 318             | MacKenzie TD, Kukolja T, House R, et al. A discharge panel at Denver Health, focused on complex patients, may have influenced decline in length-of-stay. <i>Health Aff (Millwood).</i> 2012;31(8):1786-1795.                                 | 7/7            |
| 319             | Macleod AD. Self-neglect of spinal injured patients. <i>Paraplegia.</i> 1988;26(5):340-349.                                                                                                                                                  | 10/10          |
| 320             | Macleod L, Macleod G. Control cognitions and psychological disturbance in people with contrasting physically disabling conditions. <i>Disabil Rehabil.</i> 1998;20(12):448-456.                                                              | 13/13          |
| 321             | Mann R, Schaefer C, Sadosky A, et al. Burden of spinal cord injury-related neuropathic pain in the United States: retrospective chart review and cross-sectional survey. <i>Spinal Cord.</i> 2013;51(7):564-570.                             | 10/10          |
| 322             | Martin Ginis KA, Jetha A, Mack DE, Hetz S. Physical activity and subjective well-being among people with spinal cord injury: a meta-analysis. <i>Spinal Cord.</i> 2010;48(1):65-72.                                                          | 11/11          |
| 323             | Martin Ginis KA, Jorgensen S, Stapleton J. Exercise and sport for persons with spinal cord injury. <i>Pm R.</i> 2012;4(11):894-900.                                                                                                          | 7/7            |
| 324             | Martz E, Livneh H, Gontkovsky ST, Stokic DS. Psychosocial responses to spinal cord injury as predictors of pressure sores. <i>International Journal of Clinical and Health Psychology.</i> 2010;10(2):203-223.                               | 4/4            |
| 325             | Martz E, Livneh H, Priebe M, Wuermser LA, Ottomanelli L. Predictors of psychosocial adaptation among people with spinal cord injury or disorder. <i>Arch Phys Med Rehabil.</i> 2005;86(6):1182-1192.                                         | 13/13          |
| 326             | Martz E, Livneh H. Death anxiety as a predictor of future time orientation among individuals with spinal cord injuries. <i>Disabil Rehabil.</i> 2003;25(18):1024-1032.                                                                       | 4/4            |

*Continued*

**Continued**

| Citation Number | Citation                                                                                                                                                                                                                                            | Exclusion Code |
|-----------------|-----------------------------------------------------------------------------------------------------------------------------------------------------------------------------------------------------------------------------------------------------|----------------|
| 327             | Martz E. Death anxiety as a predictor of posttraumatic stress levels among individuals with spinal cord injuries. <i>Death Stud.</i> 2004;28(1):1-17.                                                                                               | 2/2            |
| 328             | Martz E. Do post-traumatic stress symptoms predict reactions of adaptation to disability after a sudden-onset spinal cord injury? <i>International Journal of Rehabilitation Research.</i> 2004;27(3):185-194.                                      | 4/4            |
| 329             | Martz E. Do Reactions of Adaptation to Disability Influence the Fluctuation of Future Time Orientation Among Individuals with Spinal Cord Injuries? <i>Rehabilitation Counseling Bulletin.</i> 2004;47(2):86-95.                                    | 4/4            |
| 330             | Matsuda Y, Kubo T, Fujino Y, Matsuda S, Wada F, Sugita A. Relationship Between Depressive State and Treatment Characteristics of Acute Cervical Spinal Cord Injury in Japan. <i>J Epidemiol.</i> 2016;26(1):30-35.                                  | 2/2            |
| 331             | McAfee PC, Bohlman HH, Han JS, Salvagno RT. Comparison of nuclear magnetic resonance imaging and computed tomography in the diagnosis of upper cervical spinal cord compression. <i>Spine.</i> 1986;11(4):295-304.                                  | 6/6            |
| 332             | McColl MA, Rosenthal C. A model of resource needs of aging spinal cord injured men. <i>Paraplegia.</i> 1994;32(4):261-270.                                                                                                                          | 13/13          |
| 333             | McColl MA, Skinner HA. Measuring psychological outcomes following rehabilitation. <i>Can J Public Health.</i> 1992;83 Suppl 2:S12-18.                                                                                                               | 4/4            |
| 334             | McColl MA, Skinner HA. Spinal cord injury and lifestyle health risks. <i>Canadian Journal of Rehabilitation.</i> 1995;9(2):69-82.                                                                                                                   | 10/10          |
| 335             | McDermott S, Moran R, Platt T, Isaac T, Wood H, Dasari S. Risk for onset of health conditions among community-living adults with spinal cord and traumatic brain injuries. <i>Primary Health Care Research and Development.</i> 2007;8(1):36-43.    | 10/10          |
| 336             | McGowan MB, Roth S. Family functioning and functional independence in spinal cord injury adjustment. <i>Paraplegia.</i> 1987;25(4):357-365.                                                                                                         | 4/4            |
| 337             | McIntyre A, Cheung KY, Kwok C, Mehta S, Wolfe D, Teasell RW. Quality of life and bladder management post spinal cord injury: A systematic review. <i>Applied Research in Quality of Life.</i> 2014;9(4):1081-1096.                                  | 2/2            |
| 338             | McKinley WO, Kolakowsky SA, Kreutzer JS. Substance abuse, violence, and outcome after traumatic spinal cord injury. <i>Am J Phys Med Rehabil.</i> 1999;78(4):306-312.                                                                               | 4/4            |
| 339             | McKinley WO, Tewksbury MA, Godbout CJ. Comparison of medical complications following nontraumatic and traumatic spinal cord injury. <i>Journal of Spinal Cord Medicine.</i> 2002;25(2):88-93.                                                       | 10/10          |
| 340             | Mehta S, McIntyre A, Dijkers M, Loh E, Teasell RW. Gabapentinoids are effective in decreasing neuropathic pain and other secondary outcomes after spinal cord injury: a meta-analysis. <i>Arch Phys Med Rehabil.</i> 2014;95(11):2180-2186.         | 11/11          |
| 341             | Mehta S, McIntyre A, Janzen S, Loh E, Teasell R, Spinal Cord Injury Rehabilitation Evidence T. Systematic Review of Pharmacologic Treatments of Pain After Spinal Cord Injury: An Update. <i>Arch Phys Med Rehabil.</i> 2016;97(8):1381-1391.e1381. | 4/4            |
| 342             | Meyers AR, Bisbee A, Winter M. The "Boston model" of managed care and spinal cord injury: a cross-sectional study of the outcomes of risk-based, prepaid, managed care. <i>Arch Phys Med Rehabil.</i> 1999;80(11):1450-1456.                        | 4/4            |
| 343             | Meyers AR, Feltin M, Master RJ, et al. Rehospitalization and spinal cord injury: cross-sectional survey of adults living independently. <i>Arch Phys Med Rehabil.</i> 1985;66(10):704-708.                                                          | 4/4            |
| 344             | Migliorini C, Sinclair A, Brown D, Tonge B, New P. Prevalence of mood disturbance in Australian adults with chronic spinal cord injury. <i>Intern Med J.</i> 2015;45(10):1014-1019.                                                                 | 10/10          |
| 345             | Migliorini C, Tonge B. Reflecting on subjective well-being and spinal cord injury. <i>Journal of Rehabilitation Medicine.</i> 2009;41(6):445-450.                                                                                                   | 13/13          |
| 346             | Miller SM. The measurement of self-efficacy in persons with spinal cord injury: psychometric validation of the moorong self-efficacy scale. <i>Disabil Rehabil.</i> 2009;31(12):988-993.                                                            | 4/4            |
| 347             | Miller WC, Anton HA, Townson AF. Measurement properties of the CESD scale among individuals with spinal cord injury. <i>Spinal cord.</i> 2008;46(4):287-292.                                                                                        | 4/4            |
| 348             | Min JA, Lee CU, Hwang SI, et al. The moderation of resilience on the negative effect of pain on depression and post-traumatic growth in individuals with spinal cord injury. <i>Disabil Rehabil.</i> 2014;36(14):1196-1202.                         | 10/10          |
| 349             | Molton IR, Stoelb BL, Jensen MP, Ehde DM, Raichle KA, Cardenas DD. Psychosocial factors and adjustment to chronic pain in spinal cord injury: replication and cross-validation. <i>J Rehabil Res Dev.</i> 2009;46(1):31-42.                         | 4/4            |
| 350             | Moodley N, Pillay BJ. Post-traumatic stress disorder in patients with spinal-cord injuries. <i>South African Journal of Psychology.</i> 2013;43(2):182-197.                                                                                         | 4/4            |
| 351             | Moore AD, Bombardier CH, Brown PB, Patterson DR. Coping and emotional attributions following spinal cord injury. <i>International Journal of Rehabilitation Research.</i> 1994;17(1):39-48.                                                         | 13/13          |
| 352             | Mueller AD. Personality problems of the spinal cord injured. <i>Journal of Consulting Psychology.</i> 1950;14(3):189-192.                                                                                                                           | 7/7            |
| 353             | Muller R, Cieza A, Geyh S. Rasch analysis of the Hospital Anxiety and Depression Scale in spinal cord injury. <i>Rehabilitation Psychology.</i> 2012;57(3):214-223.                                                                                 | 4/4            |

*Continued*

*Continued*

| Citation Number | Citation                                                                                                                                                                                                                                                                 | Exclusion Code |
|-----------------|--------------------------------------------------------------------------------------------------------------------------------------------------------------------------------------------------------------------------------------------------------------------------|----------------|
| 354             | Muller R, Gertz KJ, Molton IR, et al. Effects of a Tailored Positive Psychology Intervention on Well-Being and Pain in Individuals with Chronic Pain and a Physical Disability. <i>Clinical journal of pain</i> . 2016;32(1):32-44.                                      | 4/4            |
| 355             | Munce SE, Fehlings MG, Straus SE, et al. Views of people with traumatic spinal cord injury about the components of self-management programs and program delivery: a Canadian pilot study. <i>BMC Neurology</i> . 2014;14:209.                                            | 10/10          |
| 356             | Muraki S, Tsunawake N, Hiramatsu S, Yamasaki M. The effect of frequency and mode of sports activity on the psychological status in tetraplegics and paraplegics. <i>Spinal Cord</i> . 2000;38(5):309-314.                                                                | 4/4            |
| 357             | Murray RF, Asghari A, Egorov DD, et al. Impact of spinal cord injury on self-perceived pre- and postmorbidity cognitive, emotional and physical functioning. <i>Spinal Cord</i> . 2007;45(6):429-436.                                                                    | 10/10          |
| 358             | Nagumo N. Depression occurring after delirium in traumatic spinal cord injury: A retrospective study. <i>Seishin Igaku (Clinical Psychiatry)</i> . 1999;41(4):367-371.                                                                                                   | 8/8            |
| 359             | Nestoros JN, Demers-Desrosiers LA, Dalicandro LA. Levels of anxiety and depression in spinal cord-injured patients. <i>Psychosomatics</i> . 1982;23(8):823-824, 827, 830.                                                                                                | 10/10          |
| 360             | Nicholls E, Lehan T, Plaza SL, et al. Factors influencing acceptance of disability in individuals with spinal cord injury in Neiva, Colombia, South America. <i>Disabil Rehabil</i> . 2012;34(13):1082-1088.                                                             | 4/4            |
| 361             | Nicholson Perry K, Nicholas MK, Middleton J, Siddall P. Psychological characteristics of people with spinal cord injury-related persisting pain referred to a tertiary pain management center. <i>J Rehabil Res Dev</i> . 2009;46(1):57-67.                              | 10/10          |
| 362             | Nicholson Perry K, Nicholas MK, Middleton J. Spinal cord injury-related pain in rehabilitation: a cross-sectional study of relationships with cognitions, mood and physical function. <i>Eur J Pain</i> . 2009;13(5):511-517.                                            | 13/13          |
| 363             | Nicolais CJ, Perrin PB, Panyavin I, et al. Family dynamics and psychosocial functioning in children with SCI/D from Colombia, South America. <i>Journal of Spinal Cord Medicine</i> . 2016;39(1):58-66.                                                                  | 10/10          |
| 364             | Nielsen MS. Post-traumatic stress disorder and emotional distress in persons with spinal cord lesion. <i>Spinal Cord</i> . 2003;41(5):296-302.                                                                                                                           | 10/10          |
| 365             | Nielson MS. Crisis support and coping as mediators of well-being in persons with spinal cord lesion. <i>Journal of Clinical Psychology in Medical Settings</i> . 2003;10(2):91-99.                                                                                       | 10/10          |
| 366             | Noonan VK, Kopec JA, Zhang H, Dvorak MF. Impact of associated conditions resulting from spinal cord injury on health status and quality of life in people with traumatic central cord syndrome. <i>Arch Phys Med Rehabil</i> . 2008;89(6):1074-1082.                     | 10/10          |
| 367             | Norrbrink Budh C, Hultling C, Lundeberg T. Quality of sleep in individuals with spinal cord injury: a comparison between patients with and without pain. <i>Spinal Cord</i> . 2005;43(2):85-95.                                                                          | 4/4            |
| 368             | Norweg A, Jette AM, Houlihan B, Ni P, Boninger ML. Patterns, predictors, and associated benefits of driving a modified vehicle after spinal cord injury: findings from the National Spinal Cord Injury Model Systems. <i>Arch Phys Med Rehabil</i> . 2011;92(3):477-483. | 3/3            |
| 369             | Nott MT, Baguley IJ, Heriseanu R, et al. Effects of concomitant spinal cord injury and brain injury on medical and functional outcomes and community participation. <i>Topics in Spinal Cord Injury Rehabilitation</i> . 2014;20(3):225-235.                             | 10/10          |
| 370             | Osteraker AL, Levi R. Indicators of psychological distress in postacute spinal cord injured individuals. <i>Spinal Cord</i> . 2005;43(4):223-229.                                                                                                                        | 10/10          |
| 371             | Otis C, Marchand A, Courtois F. Peritraumatic dissociation as a mediator of peritraumatic distress and PTSD: a retrospective, cross-sectional study. <i>J Trauma Dissociation</i> . 2012;13(4):469-477.                                                                  | 10/10          |
| 372             | Otis C, Marchand A, Courtois F. Risk factors for posttraumatic stress disorder in persons with spinal cord injury. <i>Topics in Spinal Cord Injury Rehabilitation</i> . 2012;18(3):253-263.                                                                              | 10/10          |
| 373             | Overholser JC, Schubert DS, Foliart R, Frost F. Assessment of emotional distress following a spinal cord injury. <i>Rehabilitation Psychology</i> . 1993;38(3):187-198.                                                                                                  | 4/4            |
| 374             | Paker N, Bugdayci D, Dere D, Altuncu Y. Comparison of the coping strategies, anxiety, and depression in a group of Turkish spinal cord injured patients and their family caregivers in a rehabilitation center. <i>Eur J Phys Rehabil Med</i> . 2011;47(4):595-600.      | 10/10          |
| 375             | Paker N, Bugdayci D, Kesiktas N, Sahin M, Elfstrom ML. Reliability and validity of the Turkish version of spinal cord lesion-related coping strategies. <i>Spinal Cord</i> . 2014;52(5):383-387.                                                                         | 2/2            |
| 376             | Paker N, Bugdayci D, Midik M, Celik B, Kesiktas N. Reliability of the Turkish version of the hospital anxiety and depression scale in the people with traumatic spinal cord injury. <i>Neurorehabilitation</i> . 2013;33(2):337-341.                                     | 2/2            |
| 377             | Pang MY, Eng JJ, Lin KH, Tang PF, Hung C, Wang YH. Association of depression and pain interference with disease-management self-efficacy in community-dwelling individuals with spinal cord injury. <i>Journal of Rehabilitation Medicine</i> . 2009;41(13):1068-1073.   | 13/13          |
| 378             | Paniak CE, Shore DL, Rourke BP, Finlayson MA, Moustacalis E. Long-term vocational functioning after severe closed head injury: a controlled study. <i>Arch Clin Neuropsychol</i> . 1992;7(6):529-540.                                                                    | 4/4            |
| 379             | Paulsen P, French R, Sherrill C. Comparison of mood states of college able-bodied and wheelchair basketball players. <i>Percept Mot Skills</i> . 1991;73(2):396-398.                                                                                                     | 4/4            |
| 380             | Pelletier PM, Alfano DP, Fink MP. Social support, locus of control and psychological health in family members following head or spinal cord injury. <i>Appl Neuropsychol</i> . 1994;1(1-2):38-44.                                                                        | 10/10          |

*Continued*

**Continued**

| Citation Number | Citation                                                                                                                                                                                                                                                                                               | Exclusion Code |
|-----------------|--------------------------------------------------------------------------------------------------------------------------------------------------------------------------------------------------------------------------------------------------------------------------------------------------------|----------------|
| 381             | Perez M, Pilsecker C. Family therapy with spinal cord injured substance abusers. <i>Soc Work Health Care</i> . 1989;14(2):15-25.                                                                                                                                                                       | 7/7            |
| 382             | Perez M, Pilsecker C. Group psychotherapy with spinal cord injured substance abusers. <i>Paraplegia</i> . 1994;32(3):188-192.                                                                                                                                                                          | 7/7            |
| 383             | Perry KN, Nicholas MK, Middleton J. Spinal cord injury-related pain in rehabilitation: A cross-sectional study of relationships with cognitions, mood and physical function. <i>Eur J Pain</i> . 2009;13(5):511-517.                                                                                   | 4/4            |
| 384             | Perry KN, Nicholas MK, Middleton JW. Comparison of a pain management program with usual care in a pain management center for people with spinal cord injury-related chronic pain. <i>Clinical Journal of Pain</i> . 2010;26(3):206-216.                                                                | 10/10          |
| 385             | Peter C, Muller R, Cieza A, Geyh S. Psychological resources in spinal cord injury: a systematic literature review. <i>Spinal Cord</i> . 2012;50(3):188-201.                                                                                                                                            | 11/11          |
| 386             | Pollard C, Kennedy P. A longitudinal analysis of emotional impact, coping strategies and post-traumatic psychological growth following spinal cord injury: a 10-year review. <i>Br J Health Psychol</i> . 2007;12(Pt 3):347-362.                                                                       | 13/13          |
| 387             | Post MW, Adriaansen JJ, Charlifue S, Biering-Sorensen F, van Asbeck FW. Good validity of the international spinal cord injury quality of life basic data set. <i>Spinal Cord</i> . 2016;54(4):314-318.                                                                                                 | 6/6            |
| 388             | Post MW, Gerritsen J, Diederiks JP, De Witte LP. Measuring health status of people who are wheelchair-dependent: Validity of the Sickness Impact Profile 68 and the Nottingham Health Profile. <i>Disability and Rehabilitation: An International, Multidisciplinary Journal</i> . 2001;23(6):245-253. | 6/6            |
| 389             | Post MW, van Leeuwen CM, van Koppenhagen CF, de Groot S. Validity of the Life Satisfaction questions, the Life Satisfaction Questionnaire, and the Satisfaction With Life Scale in persons with spinal cord injury. <i>Arch Phys Med Rehabil</i> . 2012;93(10):1832-1837.                              | 6/6            |
| 390             | Post MW, van Leeuwen CM. Psychosocial issues in spinal cord injury: a review. <i>Spinal Cord</i> . 2012;50(5):382-389.                                                                                                                                                                                 | 11/11          |
| 391             | Price GL, Kendall M, Amsters DI, Pershouse KJ. Perceived causes of change in function and quality of life for people with long duration spinal cord injury. <i>Clinical Rehabilitation</i> . 2004;18(2):164-171.                                                                                       | 4/4            |
| 392             | Price M. Causes of death in 11 of 227 patients with traumatic spinal cord injury over period of nine years. <i>Paraplegia</i> . 1973;11(3):217-220.                                                                                                                                                    | 10/10          |
| 393             | Putzke JD, Barrett JJ, Richards JS, DeVivo MJ. Age and spinal cord injury: an emphasis on outcomes among the elderly. <i>Journal of Spinal Cord Medicine</i> . 2003;26(1):37-44.                                                                                                                       | 13/13          |
| 394             | Putzke JD, Elliot TR, Richards J. Marital status and adjustment 1 year post-spinal- cord-injury. <i>Journal of Clinical Psychology in Medical Settings</i> . 2001;8(2):101-107.                                                                                                                        | 4/4            |
| 395             | Putzke JD, Hicken BL, Richards JS. Race: predictor versus proxy variable? Outcomes after spinal cord injury. <i>Arch Phys Med Rehabil</i> . 2002;83(11):1603-1611.                                                                                                                                     | 4/4            |
| 396             | Putzke JD, Richards J, Dowler RN. The impact of pain in spinal cord injury: A case-control study. <i>Rehabilitation Psychology</i> . 2000;45(4):386-401.                                                                                                                                               | 10/10          |
| 397             | Putzke JD, Richards JS, Hicken BL, DeVivo MJ. Interference due to pain following spinal cord injury: important predictors and impact on quality of life. <i>Pain</i> . 2002;100(3):231-242.                                                                                                            | 4/4            |
| 398             | Quale AJ, Schanke AK, Frosliel KF, Roise O. Severity of injury does not have any impact on posttraumatic stress symptoms in severely injured patients. <i>Injury</i> . 2009;40(5):498-505.                                                                                                             | 10/10          |
| 399             | Quale AJ, Schanke AK. Resilience in the face of coping with a severe physical injury: a study of trajectories of adjustment in a rehabilitation setting. <i>Rehabilitation Psychology</i> . 2010;55(1):12-22.                                                                                          | 10/10          |
| 400             | Radnitz CL, Broderick CP, Perez-Strumolo L, et al. The prevalence of psychiatric disorders in veterans with spinal cord injury: a controlled comparison. <i>J Nerv Ment Dis</i> . 1996;184(7):431-433.                                                                                                 | 13/13          |
| 401             | Radnitz CL, McGrath RE, Tirsch DD, et al. Use of the Beck Depression Inventory in veterans with spinal cord injury. <i>Rehabilitation Psychology</i> . 1997;42(2):93-101.                                                                                                                              | 13/13          |
| 402             | Radnitz CL, Schlein IS, Hsu L. The effect of prior trauma exposure on the development of PTSD following spinal cord injury. <i>J Anxiety Disord</i> . 2000;14(3):313-324.                                                                                                                              | 10/10          |
| 403             | Rahnama P, Javidan AN, Saberi H, et al. Does religious coping and spirituality have a moderating role on depression and anxiety in patients with spinal cord injury? A study from Iran. <i>Spinal Cord</i> . 2015;53(12):870-874.                                                                      | 3/3            |
| 404             | Raichle KA, Hanley M, Jensen MP, Cardenas DD. Cognitions, coping, and social environment predict adjustment to pain in spinal cord injury. <i>Journal of Pain</i> . 2007;8(9):718-729.                                                                                                                 | 13/13          |
| 405             | Reidy K, Caplan B. Causal factors in spinal cord injury: patients' evolving perceptions and association with depression. <i>Arch Phys Med Rehabil</i> . 1994;75(8):837-842.                                                                                                                            | 10/10          |
| 406             | Revell SM. Symptom clusters in traumatic spinal cord injury: An exploratory literature review. <i>J Neurosci Nurs</i> . 2011;43(2):85-93.                                                                                                                                                              | 11/11          |
| 407             | Richards JS, Bombardier CH, Wilson CS, et al. Efficacy of venlafaxine XR for the treatment of pain in patients with spinal cord injury and major depression: a randomized, controlled trial. <i>Archives of physical medicine and rehabilitation</i> . 2015;96(4):680-689.                             | 4/4            |
| 408             | Richards JS, Meredith RL, Nepomuceno C, Fine PR, Bennett G. Psycho-social aspects of chronic pain in spinal cord injury. <i>Pain</i> . 1980;8(3):355-366.                                                                                                                                              | 10/10          |

*Continued*

*Continued*

| Citation Number | Citation                                                                                                                                                                                                                                                                                    | Exclusion Code |
|-----------------|---------------------------------------------------------------------------------------------------------------------------------------------------------------------------------------------------------------------------------------------------------------------------------------------|----------------|
| 409             | Richards JS, Osuna FJ, Jaworski TM, Novack TA, Leli DA, Boll TJ. The effectiveness of different methods of defining traumatic brain injury in predicting postdischarge adjustment in a spinal cord injury population. <i>Arch Phys Med Rehabil.</i> 1991;72(5):275-279.                     | 4/4            |
| 410             | Richards JS. Psychologic adjustment to spinal cord injury during first postdischarge year. <i>Arch Phys Med Rehabil.</i> 1986;67(6):362-365.                                                                                                                                                | 10/10          |
| 411             | Richardson EJ, Richards J. Factor structure of the PHQ-9 screen for depression across time since injury among persons with spinal cord injury. <i>Rehabilitation Psychology.</i> 2008;53(2):243-249.                                                                                        | 4/4            |
| 412             | Rintala DH, Young ME, Hart KA, Clearman RR, Fuhrer MJ. Social support and the well-being of persons with spinal cord injury living in the community. <i>Rehabilitation Psychology.</i> 1992;37(3):155-163.                                                                                  | 13/13          |
| 413             | Rintala DH, Young ME, Hart KA, Fuhrer MJ. The relationship between the extent of reciprocity with social supporters and measures of depressive symptomatology, impairment, disability, and handicap in persons with spinal cord injury. <i>Rehabilitation Psychology.</i> 1994;39(1):15-27. | 13/13          |
| 414             | Rintala DH. Predictive validity of social support relative to psychological well-being in men with spinal cord injury. <i>Rehabilitation Psychology.</i> 2013;58(4):422-428.                                                                                                                | 4/4            |
| 415             | Riordan A, Kelly EH, Klaas SJ, Vogel LC. Psychosocial outcomes among youth with spinal cord injury by neurological impairment. <i>Journal of Spinal Cord Medicine.</i> 2015;38(1):76-83.                                                                                                    | 4/4            |
| 416             | Rish BL, Dilustro JF, Salazar AM, Schwab KA, Brown HR. Spinal cord injury: a 25-year morbidity and mortality study. <i>Mil Med.</i> 1997;162(2):141-148.                                                                                                                                    | 10/10          |
| 417             | Robinson-Whelen S, Taylor HB, Hughes RB, Wenzel L, Nosek MA. Depression and depression treatment in women with spinal cord injury. <i>Topics in Spinal Cord Injury Rehabilitation.</i> 2014;20(1):23-31.                                                                                    | 10/10          |
| 418             | Rodrigues D, Tran Y, Wijesuriya N, Guest R, Middleton J, Craig A. Pain intensity and its association with negative mood States in patients with spinal cord injury. <i>Pain Ther.</i> 2013;2(2):113-119.                                                                                    | 4/4            |
| 419             | Rosenberg DE, Bombardier CH, Artherholt S, Jensen MP, Motl RW. Self-reported depression and physical activity in adults with mobility impairments. <i>Arch Phys Med Rehabil.</i> 2013;94(4):731-736.                                                                                        | 11/11          |
| 420             | Roth E, Davidoff G, Thomas P, et al. A controlled study of neuropsychological deficits in acute spinal cord injury patients. <i>Paraplegia.</i> 1989;27(6):480-489.                                                                                                                         | 2/2            |
| 421             | Rothstein JL, Levy E, Fecher R, Gordon SK, Bauman WA. Drug use and abuse in an urban veteran spinal cord injured population. <i>J Am Paraplegia Soc.</i> 1992;15(4):217-220.                                                                                                                | 10/10          |
| 422             | Rowland JL, White GW, Wyatt DA. Analysis of an intervention to reduce or prevent secondary conditions for people with spinal cord injuries. <i>Journal of clinical psychology in medical settings.</i> 2006;13(3):263-271.                                                                  | 6/6            |
| 423             | Russell HF, January AM, Kelly EH, Mulcahey MJ, Betz RR, Vogel LC. Patterns of coping strategy use and relationships with psychosocial health in adolescents with spinal cord injury. <i>J Pediatr Psychol.</i> 2015;40(5):535-543.                                                          | 2/2            |
| 424             | Saadat S, Javadi M, Divshali BS, et al. Health-related quality of life among individuals with long-standing spinal cord injury: a comparative study of veterans and non-veterans. <i>BMC Public Health.</i> 2010;10:6.                                                                      | 4/4            |
| 425             | Sabre L, Rekan T, Asser T, Korv J. Mortality and causes of death after traumatic spinal cord injury in Estonia. <i>Journal of Spinal Cord Medicine.</i> 2013;36(6):687-694.                                                                                                                 | 2/2            |
| 426             | Sadosky A, Parsons B, Emir B, Nieshoff EC. Pain relief and functional improvement in patients with neuropathic pain associated with spinal cord injury: an exploratory analysis of pregabalin clinical trials. <i>J Pain Res.</i> 2016;9:405-416.                                           | 4/4            |
| 427             | Saikkonen J, Karppi P, Huusko TM, Dahlberg A, Makinen J, Uutela T. Life situation of spinal cord-injured persons in Central Finland. <i>Spinal Cord.</i> 2004;42(8):459-465.                                                                                                                | 13/13          |
| 428             | Salinas FA, Lugo LH, Garcia HI. Efficacy of early treatment with carbamazepine in prevention of neuropathic pain in patients with spinal cord injury. <i>American journal of physical medicine &amp; rehabilitation / Association of Academic Physiatrists.</i> 2012;91(12):1020-1027.      | 11/11          |
| 429             | Salonia A, Munarriz RM, Naspro R, et al. Women's sexual dysfunction: a pathophysiological review. <i>BJU Int.</i> 2004;93(8):1156-1164.                                                                                                                                                     | 7/7            |
| 430             | Salter JE, Smith SD, Ethans KD. Positive and negative affect in individuals with spinal cord injuries. <i>Spinal Cord.</i> 2013;51(3):252-256.                                                                                                                                              | 10/10          |
| 431             | Sammallahti P, Kannisto M, Aalberg V. Psychological defenses and psychiatric symptoms in adults with pediatric spinal cord injuries. <i>Spinal Cord.</i> 1996;34(11):669-672.                                                                                                               | 4/4            |
| 432             | Saulino M, Averna JF. Evaluation and Management of SCI-Associated Pain. <i>Curr Pain Headache Rep.</i> 2016;20(9):53.                                                                                                                                                                       | 6/6            |
| 433             | Saunders LL, Krause JS, Carpenter MJ, Saladin M. Risk behaviors related to cigarette smoking among persons with spinal cord injury. <i>Nicotine Tob Res.</i> 2014;16(2):224-230.                                                                                                            | 2/2            |
| 434             | Schandler SL, Cohen MJ, Vulpe M. Problem solving and coping strategies in persons with spinal cord injury who have and do not have a family history of alcoholism. <i>Journal of Spinal Cord Medicine.</i> 1996;19(2):78-86.                                                                | 10/10          |
| 435             | Schnoll SH, Heinemann AW, Doll M, Armstrong KJ. Substance use and receipt of treatment in persons with recent spinal cord injuries. <i>NIDA Res Monogr.</i> 1989;95:426-427.                                                                                                                | 6/6            |

*Continued*



**Continued**

| Citation Number | Citation                                                                                                                                                                                                                                                         | Exclusion Code |
|-----------------|------------------------------------------------------------------------------------------------------------------------------------------------------------------------------------------------------------------------------------------------------------------|----------------|
| 436             | Schulz R, Decker S. Long-term adjustment to physical disability: the role of social support, perceived control, and self-blame. <i>J Pers Soc Psychol</i> . 1985;48(5):1162-1172.                                                                                | 13/13          |
| 437             | Scivoletto G, Petrelli A, Di Lucente L, Castellano V. Psychological investigation of spinal cord injury patients. <i>Spinal Cord</i> . 1997;35(8):516-520.                                                                                                       | 2/2            |
| 438             | Shadish WR, Hickman D, Arrick M. Psychological problems of spinal cord injury patients: Emotional distress as a function of time and locus of control. <i>Journal of Consulting and Clinical Psychology</i> . 1981;49(2):297.                                    | 7/7            |
| 439             | Shin JC, Goo HR, Yu SJ, Kim DH, Yoon SY. Depression and Quality of Life in Patients within the First 6 Months after the Spinal Cord Injury. <i>Ann</i> . 2012;36(1):119-125.                                                                                     | 10/10          |
| 440             | Shin JI, Chae JH, Min JA, et al. Resilience as a possible predictor for psychological distress in chronic spinal cord injured patients living in the community. <i>Ann</i> . 2012;36(6):815-820.                                                                 | 10/10          |
| 441             | Shnek ZM, Foley FW, LaRocca NG, et al. Helplessness, self-efficacy, cognitive distortions, and depression in multiple sclerosis and spinal cord injury. <i>Ann Behav Med</i> . 1997;19(3):287-294.                                                               | 13/13          |
| 442             | Skinner AL, Armstrong KJ, Rich J. Depression and spinal cord injury: A review of diagnostic methods for depression, 1985 to 2000. <i>Rehabilitation Counseling Bulletin</i> . 2003;46(3):174-175.                                                                | 7/7            |
| 443             | Smedema SM, Ebener D. Substance abuse and psychosocial adaptation to physical disability: analysis of the literature and future directions. <i>Disabil Rehabil</i> . 2010;32(16):1311-1319.                                                                      | 11/11          |
| 444             | Smith BM, Weaver FM, Ullrich PM. Prevalence of depression diagnoses and use of antidepressant medications by veterans with spinal cord injury. <i>Am J Phys Med Rehabil</i> . 2007;86(8):662-671.                                                                | 13/13          |
| 445             | Smith TF, Russell HF, Kelly EH, Mulcahey MJ, Betz RR, Vogel LC. Examination and measurement of coping among adolescents with spinal cord injury. <i>Spinal Cord</i> . 2013;51(9):710-714.                                                                        | 2/2            |
| 446             | Soden RJ, Walsh J, Middleton JW, Craven ML, Rutkowski SB, Yeo JD. Causes of death after spinal cord injury. <i>Spinal Cord</i> . 2000;38(10):604-610.                                                                                                            | 10/10          |
| 447             | Somasundaram O, Balakrishnan S, Ravindran OS, Shanmugasundaram TK. A psychological study of spinal cord injured patients involved in the Madras Paraplegia Project. <i>Paraplegia</i> . 1992;30(11):799-802.                                                     | 10/10          |
| 448             | Stroud MW, Bombardier CH, Dyer JR, Rimmele CT, Esselman PC. Preinjury alcohol and drug use among persons with spinal cord injury: implications for rehabilitation. <i>Journal of Spinal Cord Medicine</i> . 2011;34(5):461-472.                                  | 13/13          |
| 449             | Stroud MW, Turner JA, Jensen MP, Cardenas DD. Partner responses to pain behaviors are associated with depression and activity interference among persons with chronic pain and spinal cord injury. <i>Journal of Pain</i> . 2006;7(2):91-99.                     | 13/13          |
| 450             | Summers JD, Rapoff MA, Varghese G, Porter K, Palmer RE. Psychosocial factors in chronic spinal cord injury pain. <i>Pain</i> . 1991;47(2):183-189.                                                                                                               | 13/13          |
| 451             | Tamplin J, Baker FA, Grocke D, Berlowitz DJ. Thematic analysis of the experience of group music therapy for people with chronic quadriplegia. <i>Topics in Spinal Cord Injury Rehabilitation</i> . 2014;20(3):236-247.                                           | 10/10          |
| 452             | Tasiemski T, Kennedy P, Gardner BP, Blaikley RA. Athletic Identity and Sports Participation in People With Spinal Cord Injury. <i>Adapt Phys Act Q</i> . 2004;21(4):364-378.                                                                                     | 13/13          |
| 453             | Tasiemski T, Kennedy P, Gardner BP, Taylor N. The association of sports and physical recreation with life satisfaction in a community sample of people with spinal cord injuries. <i>Neurorehabilitation</i> . 2005;20(4):253-265.                               | 4/4            |
| 454             | Tate DG, Forchheimer M, Bombardier CH, Heinemann AW, Neumann HD, Fann JR. Differences in quality of life outcomes among depressed spinal cord injury trial participants. <i>Archives of physical medicine and rehabilitation</i> . 2015;96(2):340-348.           | 4/4            |
| 455             | Tate DG, Forchheimer M, Maynard F, Davidoff G, Dijkers M. Comparing two measures of depression in spinal cord injury. <i>Rehabilitation Psychology</i> . 1993;38(1):53-61.                                                                                       | 13/13          |
| 456             | Tate DG, Forchheimer MB, Karana-Zebari D, Chiodo AE, Kendall Thomas JY. Depression and pain among inpatients with spinal cord injury and spinal cord disease: differences in symptoms and neurological function. <i>Disabil Rehabil</i> . 2013;35(14):1204-1212. | 4/4            |
| 457             | Tate DG, Heinrich RK, Maynard F, Buckelew SP. Moderator-variable effect on the Brief Symptom Inventory test-item endorsements of spinal cord injury patients. <i>Paraplegia</i> . 1994;32(7):473-479.                                                            | 4/4            |
| 458             | Tate DG, Kalpakjian C, Chiodo A, et al. Treatment of mild to moderate depression in persons with SCI: A randomized clinical trial. <i>Archives of physical medicine and rehabilitation</i> . 93(10):E9.                                                          | 7/7            |
| 459             | Tate DG, Kewman DG, Maynard F. The Brief Symptom Inventory: Measuring psychological distress in spinal cord injury. <i>Rehabilitation Psychology</i> . 1990;35(4):211-216.                                                                                       | 4/4            |
| 460             | Tate DG. Alcohol use among spinal cord-injured patients. <i>Am J Phys Med Rehabil</i> . 1993;72(4):192-195.                                                                                                                                                      | 13/13          |
| 461             | Tavakoli SA, Kavian M, Bakhsh SC, et al. Is Level of Injury a Determinant of Quality of Life Among Individuals with Spinal Cord Injury? A Tertiary Rehabilitation Center Report. <i>Oman med</i> . 2016;31(2):112-116.                                           | 2/2            |
| 462             | Tawashy AE, Eng JJ, Lin KH, Tang PF, Hung C. Physical activity is related to lower levels of pain, fatigue and depression in individuals with spinal-cord injury: a correlational study. <i>Spinal Cord</i> . 2009;47(4):301-306.                                | 10/10          |

*Continued*

*Continued*

| Citation Number | Citation                                                                                                                                                                                                                                                                               | Exclusion Code |
|-----------------|----------------------------------------------------------------------------------------------------------------------------------------------------------------------------------------------------------------------------------------------------------------------------------------|----------------|
| 463             | Tee JW, Chan CH, Gruen RL, et al. Early predictors of health-related quality of life outcomes in polytrauma patients with spine injuries: a level 1 trauma center study. <i>Global spine j.</i> 2014;4(1):21-32.                                                                       | 4/4            |
| 464             | Temple RO, Elliott TR. Personality disorder characteristics and adjustment following spinal cord injury. <i>Topics in Spinal Cord Injury Rehabilitation.</i> 2000;6(1):54-65.                                                                                                          | 10/10          |
| 465             | Tetrault M, Courtois F. Use of psychoactive substances in persons with spinal cord injury: a literature review. <i>Ann Phys Rehabil Med.</i> 2014;57(9-10):684-695.                                                                                                                    | 11/11          |
| 466             | Tirch D, Radnitz CL, Bauman WA. Depression and spinal cord injury: a monozygotic twin study. <i>Journal of Spinal Cord Medicine.</i> 1999;22(4):284-286.                                                                                                                               | 11/11          |
| 467             | Tomey KM, Chen DM, Wang X, Braunschweig CL. Dietary intake and nutritional status of urban community-dwelling men with paraplegia. <i>Arch Phys Med Rehabil.</i> 2005;86(4):664-671.                                                                                                   | 4/4            |
| 468             | Tramonti F, Gerini A, Stampacchia G. Relationship quality and perceived social support in persons with spinal cord injury. <i>Spinal Cord.</i> 2015;53(2):120-124.                                                                                                                     | 10/10          |
| 469             | Tulsky DS, Kisala PA, Kalpakjian CZ, et al. Measuring depression after spinal cord injury: Development and psychometric characteristics of the SCI-QOL Depression item bank and linkage with PHQ-9. <i>Journal of Spinal Cord Medicine.</i> 2015;38(3):335-346.                        | 6/6            |
| 470             | Turner AP, Bombardier CH, Rimmele CT. A typology of alcohol use patterns among persons with recent traumatic brain injury or spinal cord injury: implications for treatment matching. <i>Arch Phys Med Rehabil.</i> 2003;84(3):358-364.                                                | 4/4            |
| 471             | Turner JA, Jensen MP, Warms CA, Cardenas DD. Catastrophizing is associated with pain intensity, psychological distress, and pain-related disability among individuals with chronic pain after spinal cord injury. <i>Pain.</i> 2002;98(1-2):127-134.                                   | 4/4            |
| 472             | Ullrich P, Jensen M, Loeser J, Cardenas D. Catastrophizing mediates associations between pain severity, psychological distress, and functional disability among persons with spinal cord injury. <i>Rehabilitation Psychology.</i> 2007;52(4):390-398.                                 | 2/2            |
| 473             | Ullrich PM, Smith BM, Poggensee L, et al. Pain and post-traumatic stress disorder symptoms during inpatient rehabilitation among operation enduring freedom/ operation iraqi freedom veterans with spinal cord injury. <i>Arch Phys Med Rehabil.</i> 2013;94(1):80-85.                 | 13/13          |
| 474             | Valtonen K, Karlsson AK, Alaranta H, Viikari-Juntura E. Work participation among persons with traumatic spinal cord injury and meningomyelocele1. <i>Journal of Rehabilitation Medicine.</i> 2006;38(3):192-200.                                                                       | 4/4            |
| 475             | van Leeuwen CM, Edelaar-Peeters Y, Peter C, Stiggelbout AM, Post MW. Psychological factors and mental health in persons with spinal cord injury: An exploration of change or stability. <i>Journal of Rehabilitation Medicine.</i> 2015;47(6):531-537.                                 | 10/10          |
| 476             | van Leeuwen CM, Hoekstra T, van Koppenhagen CF, de Groot S, Post MW. Trajectories and predictors of the course of mental health after spinal cord injury. <i>Arch Phys Med Rehabil.</i> 2012;93(12):2170-2176.                                                                         | 2/2            |
| 477             | van Leeuwen CM, Post MW, Westers P, et al. Relationships between activities, participation, personal factors, mental health, and life satisfaction in persons with spinal cord injury. <i>Arch Phys Med Rehabil.</i> 2012;93(1):82-89.                                                 | 2/2            |
| 478             | van Leeuwen CM, van der Woude LH, Post MW. Validity of the mental health subscale of the SF-36 in persons with spinal cord injury. <i>Spinal Cord.</i> 2012;50(9):707-710.                                                                                                             | 6/6            |
| 479             | Virsedá-Chamorro M, Salinas-Casado J, Lopez-García-Moreno AM, Cobo-Cuenca AI, Esteban-Fuertes M. Sexual dysfunction in men with spinal cord injury: a case-control study. <i>Int J Impot Res.</i> 2013;25(4):133-137.                                                                  | 10/10          |
| 480             | Vissers M, van den Berg-Emons R, Sluis T, Bergen M, Stam H, Bussmann H. Barriers to and facilitators of everyday physical activity in persons with a spinal cord injury after discharge from the rehabilitation centre. <i>Journal of Rehabilitation Medicine.</i> 2008;40(6):461-467. | 4/4            |
| 481             | Weaver FM, LaVela SL, Miskevics S, Clemmons N, Janke EA, Spring B. Smoking behavior and readiness to change in male veterans with spinal cord injuries. <i>Rehabilitation Psychology.</i> 2007;52(3):304-310.                                                                          | 4/4            |
| 482             | Weaver FM, Smith B, LaVela SL, et al. Smoking behavior and delivery of evidence-based care for veterans with spinal cord injuries and disorders. <i>Journal of Spinal Cord Medicine.</i> 2011;34(1):35-45.                                                                             | 13/13          |
| 483             | Weeks DL, Greer CL, Bray BS, Schwartz CR, White JR, Jr. Association of antidepressant medication therapy with inpatient rehabilitation outcomes for stroke, traumatic brain injury, or traumatic spinal cord injury. <i>Arch Phys Med Rehabil.</i> 2011;92(5):683-695.                 | 4/4            |
| 484             | Weingardt KR, Hsu J, Dunn ME. Brief screening for psychological and substance abuse disorders in veterans with long-term spinal cord injury. <i>Rehabilitation Psychology.</i> 2001;46(3):271-278.                                                                                     | 10/10          |
| 485             | Westgren N, Levi R. Quality of life and traumatic spinal cord injury. <i>Arch Phys Med Rehabil.</i> 1998;79(11):1433-1439.                                                                                                                                                             | 4/4            |
| 486             | White B, Driver S, Warren AM. Resilience and indicators of adjustment during rehabilitation from a spinal cord injury. <i>Rehabilitation Psychology.</i> 2010;55(1):23-32.                                                                                                             | 10/10          |
| 487             | Widerstrom-Noga EG, Felipe-Cuervo E, Yeziarski RP. Chronic pain after spinal injury: interference with sleep and daily activities. <i>Arch Phys Med Rehabil.</i> 2001;82(11):1571-1577.                                                                                                | 4/4            |

*Continued*

**Continued**

| Citation Number | Citation                                                                                                                                                                                                                                                            | Exclusion Code |
|-----------------|---------------------------------------------------------------------------------------------------------------------------------------------------------------------------------------------------------------------------------------------------------------------|----------------|
| 488             | Wilcox NE, Stauffer ES. Follow-up of 423 consecutive patients admitted to the Spinal Cord Centre, Rancho Los Amigos Hospital, 1 January to 31 December 1967. <i>Paraplegia</i> . 1972;10(2):115-122.                                                                | 10/10          |
| 489             | Williams RT, Heinemann AW, Bode RK, Wilson CS, Fann JR, Tate DG. Improving measurement properties of the Patient Health Questionnaire-9 with rating scale analysis. <i>Rehabilitation Psychology</i> . 2009;54(2):198-203.                                          | 4/4            |
| 490             | Williamson ML, Elliott TR. Major depressive disorder and factorial dimensions among individuals with recent-onset spinal cord injury. <i>Rehabilitation Psychology</i> . 2013;58(1):10-17.                                                                          | 4/4            |
| 491             | Wollaars MM, Post MW, van Asbeck FW, Brand N. Spinal cord injury pain: the influence of psychologic factors and impact on quality of life. <i>Clinical Journal of Pain</i> . 2007;23(5):383-391.                                                                    | 13/13          |
| 492             | Wong AW, Heinemann AW, Wilson CS, et al. Predictors of participation enfranchisement after spinal cord injury: the mediating role of depression and moderating role of demographic and injury characteristics. <i>Arch Phys Med Rehabil</i> . 2014;95(6):1106-1113. | 4/4            |
| 493             | Wood-Dauphinee S, Exner G, Bostanci B, et al. Quality of life in patients with spinal cord injury--basic issues, assessment, and recommendations. <i>Restor Neurol Neurosci</i> . 2002;20(3-4):135-149.                                                             | 7/7            |
| 494             | Wool RN, Siegel D, Fine PR. Task performance in spinal cord injury: effect of helplessness training. <i>Arch Phys Med Rehabil</i> . 1980;61(7):321-325.                                                                                                             | 10/10          |
| 495             | Woolrich RA, Kennedy P, Tasiemski T. A preliminary psychometric evaluation of the Hospital Anxiety and Depression Scale (HADS) in 963 people living with a spinal cord injury. <i>Psychol Health Med</i> . 2006;11(1):80-90.                                        | 13/13          |
| 496             | Young ME, Rintala DH, Rossi CD, Hart KA, Fuhrer MJ. Alcohol and marijuana use in a community-based sample of persons with spinal cord injury. <i>Arch Phys Med Rehabil</i> . 1995;76(6):525-532.                                                                    | 10/10          |
| 497             | Znoj HJ, Lude P. Regulation of emotion and psychological symptoms in people with spinal cord injury. <i>Swiss Journal of Psychology / Schweizerische Zeitschrift fur Psychologie / Revue Suisse de Psychologie</i> . 2002;61(4):203-210.                            | 4/4            |

**Appendix D. Evidence Tables****Table D-1. Risk of bias of systematic reviews**

| Author, Year               | Was an "a priori" design provided? | Was there duplicate study selection? | Was there duplicate data extraction? | Was a comprehensive literature search performed? | Was the status of publication (i.e., grey literature) used as an inclusion criterion? | Was inclusion/exclusion criteria determined a priori? |
|----------------------------|------------------------------------|--------------------------------------|--------------------------------------|--------------------------------------------------|---------------------------------------------------------------------------------------|-------------------------------------------------------|
| Boldt, 2014                | Yes                                | Yes                                  | Yes                                  | Yes                                              | No                                                                                    | Yes                                                   |
| Craig, 2009                | Yes                                | Unclear                              | Unclear                              | Yes                                              | Unclear                                                                               | Yes                                                   |
| Dorstyn, 2011 (CBT)        | Yes                                | Unclear                              | Unclear                              | Yes                                              | Unclear                                                                               | Yes                                                   |
| Dorstyn, 2013 (telehealth) | Yes                                | Unclear                              | Unclear                              | Yes                                              | Unclear                                                                               | Yes                                                   |
| Jones, 2015                | Yes                                | Unclear                              | No                                   | Yes                                              | No                                                                                    | Unclear                                               |
| Kalpakjian, 2009           | Yes                                | Yes                                  | Partial                              | Yes                                              | No                                                                                    | Partial                                               |
| Le, 2016                   | Yes                                | Yes                                  | Yes                                  | Yes                                              | Yes                                                                                   | Yes                                                   |
| Lusilla-Palacios, 2015     | Yes                                | Unclear                              | Yes                                  | Yes                                              | No                                                                                    | Yes                                                   |
| Mehta, 2014                | Yes                                | Yes                                  | Yes                                  | Yes                                              | Yes                                                                                   | Yes                                                   |
| Muller, 2012               | Yes                                | Yes                                  | Yes                                  | Yes                                              | Unclear                                                                               | Yes                                                   |
| Perkes, 2014               | Yes                                | Yes                                  | Yes                                  | Yes                                              | Unclear                                                                               | Yes                                                   |
| Sakakibara, 2009           | Yes                                | Yes                                  | Yes                                  | Yes                                              | No                                                                                    | Yes                                                   |
| van Gorp, 2014             | Yes                                | Unclear                              | Unclear                              | Yes                                              | Unclear                                                                               | Yes                                                   |
| van Leeuwen, 2012          | Yes                                | Yes                                  | Unclear                              | Yes                                              | Unclear                                                                               | Yes                                                   |
| Williams, 2015             | Yes                                | Yes                                  | No                                   | Yes                                              | Unclear                                                                               | Yes                                                   |

| Author, Year               | Was a list of included studies provided? | Was a list of excluded studies provided? | Were the characteristics of the included studies provided? | Was the scientific quality of the included studies assessed and documented? | Was the scientific quality of the included studies used appropriately in formulating conclusions? |
|----------------------------|------------------------------------------|------------------------------------------|------------------------------------------------------------|-----------------------------------------------------------------------------|---------------------------------------------------------------------------------------------------|
| Boldt, 2014                | Yes                                      | Yes                                      | Yes                                                        | Yes                                                                         | Yes                                                                                               |
| Craig, 2009                | Yes                                      | No                                       | Yes                                                        | No                                                                          | No                                                                                                |
| Dorstyn, 2011 (CBT)        | Yes                                      | No                                       | Yes                                                        | Yes                                                                         | Yes                                                                                               |
| Dorstyn, 2013 (telehealth) | Yes                                      | No                                       | Yes                                                        | Yes                                                                         | Yes                                                                                               |
| Jones, 2015                | Yes                                      | No                                       | Yes                                                        | No                                                                          | No                                                                                                |
| Kalpakjian, 2009           | Yes                                      | No                                       | Yes                                                        | No                                                                          | No                                                                                                |
| Le, 2016                   | Yes                                      | No                                       | Yes                                                        | Unclear                                                                     | Unclear                                                                                           |
| Lusilla-Palacios, 2015     | Yes                                      | No                                       | Yes                                                        | No                                                                          | Unclear                                                                                           |
| Mehta, 2014                | Yes                                      | No                                       | Yes                                                        | Yes                                                                         | Yes                                                                                               |
| Muller, 2012               | No                                       | No                                       | Yes                                                        | Yes                                                                         | Yes                                                                                               |
| Perkes, 2014               | Yes                                      | No                                       | Yes                                                        | Yes                                                                         | Yes                                                                                               |
| Sakakibara, 2009           | Yes                                      | No                                       | Yes                                                        | Yes                                                                         | Yes                                                                                               |
| van Gorp, 2014             | Yes                                      | No                                       | Yes                                                        | Yes                                                                         | Yes                                                                                               |
| van Leeuwen, 2012          | Yes                                      | No                                       | Yes                                                        | Yes                                                                         | Yes                                                                                               |
| Williams, 2015             | Yes                                      | No                                       | Yes                                                        | Unclear                                                                     | Unclear                                                                                           |

| Author, Year               | Were the methods used to combine the findings of studies appropriate? Do the qualitative syntheses and Strength of Evidence ratings appropriately consider factors such as precision, consistency, and methodological limitations? | Was the likelihood of publication bias assessed? | Were conflicts of interest described for the systematic review authors? | Were conflicts of interest described for authors of the primary studies? | Risk of Bias |
|----------------------------|------------------------------------------------------------------------------------------------------------------------------------------------------------------------------------------------------------------------------------|--------------------------------------------------|-------------------------------------------------------------------------|--------------------------------------------------------------------------|--------------|
| Boldt, 2014                | Yes                                                                                                                                                                                                                                | No                                               | Yes                                                                     | No                                                                       | Low          |
| Craig, 2009                | Unclear                                                                                                                                                                                                                            | No                                               | No                                                                      | No                                                                       | High         |
| Dorstyn, 2011 (CBT)        | Yes                                                                                                                                                                                                                                | Unclear                                          | No                                                                      | No                                                                       | Medium       |
| Dorstyn, 2013 (telehealth) | Yes                                                                                                                                                                                                                                | Unclear                                          | Yes                                                                     | No                                                                       | Medium       |
| Jones, 2015                | Unclear                                                                                                                                                                                                                            | No                                               | Yes                                                                     | No                                                                       | High         |
| Kalpakjian, 2009           | Yes                                                                                                                                                                                                                                | No                                               | No                                                                      | No                                                                       | Medium       |
| Le, 2016                   | Yes                                                                                                                                                                                                                                | Yes                                              | Yes                                                                     | No                                                                       | Low          |
| Lusilla-Palacios, 2015     | No                                                                                                                                                                                                                                 | No                                               | Yes                                                                     | No                                                                       | Medium       |

*Continued*

**Continued**

| Author, Year      | Were the methods used to combine the findings of studies appropriate? Do the qualitative syntheses and Strength of Evidence ratings appropriately consider factors such as precision, consistency, and methodological limitations? | Was the likelihood of publication bias assessed? | Were conflicts of interest described for the systematic review authors? | Were conflicts of interest described for authors of the primary studies? | Risk of Bias |
|-------------------|------------------------------------------------------------------------------------------------------------------------------------------------------------------------------------------------------------------------------------|--------------------------------------------------|-------------------------------------------------------------------------|--------------------------------------------------------------------------|--------------|
| Mehta, 2014       | Yes                                                                                                                                                                                                                                | No                                               | Yes                                                                     | No                                                                       | Medium       |
| Muller, 2012      | Yes                                                                                                                                                                                                                                | No                                               | Yes                                                                     | No                                                                       | Medium       |
| Perkes, 2014      | Yes                                                                                                                                                                                                                                | Yes                                              | Yes                                                                     | No                                                                       | Low          |
| Sakakibara, 2009  | Yes                                                                                                                                                                                                                                | No                                               | No                                                                      | No                                                                       | Medium       |
| van Gorp, 2014    | Yes                                                                                                                                                                                                                                | No                                               | Yes                                                                     | No                                                                       | Medium       |
| van Leeuwen, 2012 | Yes                                                                                                                                                                                                                                | No                                               | Yes                                                                     | No                                                                       | Medium       |
| Williams, 2015    | Yes                                                                                                                                                                                                                                | Yes                                              | No                                                                      | No                                                                       | Medium       |

**Table D-2. Risk of bias of randomized controlled trials**

| Author, Year        | Randomization adequate? | Allocation concealment adequate? | Groups similar at baseline? | Outcome assessors masked? | Care provider masked? | Patient masked?       | Intention-to-treat analysis | Acceptable level of overall attrition (<20%) | Acceptable level of differential attrition (<10%) | Risk of Bias |
|---------------------|-------------------------|----------------------------------|-----------------------------|---------------------------|-----------------------|-----------------------|-----------------------------|----------------------------------------------|---------------------------------------------------|--------------|
| Cardenas, 2002      | Yes                     | Unclear                          | Yes                         | Yes                       | Yes                   | Yes                   | Yes                         | No                                           | Yes                                               | Medium       |
| Cardenas, 2013      | Yes                     | Yes                              | Yes                         | Unclear                   | Yes                   | Yes                   | Yes <sup>v</sup>            | Yes                                          | Yes                                               | Low          |
| Diego, 2002         | No                      | Unclear                          | Unclear                     | Yes                       | No                    | No                    | Unclear                     | Unclear                                      | Unclear                                           | High         |
| Fann, 2015          | Yes                     | Yes                              | Yes                         | Yes                       | Yes                   | Yes                   | Yes                         | Yes                                          | Yes                                               | Low          |
| Bombardier, 2014    |                         |                                  |                             |                           |                       |                       |                             |                                              |                                                   |              |
| Ruhe, 2005          |                         |                                  |                             |                           |                       |                       |                             |                                              |                                                   |              |
| Williams, 2016      |                         |                                  |                             |                           |                       |                       |                             |                                              |                                                   |              |
| Hicks, 2003         | No                      | Unclear                          | Yes                         | Unclear                   | No                    | No                    | Yes                         | Yes                                          | Yes                                               | High         |
| Martin-Ginnis, 2003 |                         |                                  |                             |                           |                       |                       |                             |                                              |                                                   |              |
| Houlihan, 2011      | Unclear                 | Unclear                          | No                          | Unclear                   | No                    | No                    | Yes                         | Yes                                          | Yes                                               | Medium       |
| Houlihan, 2013      |                         |                                  |                             |                           |                       |                       |                             |                                              |                                                   |              |
| Mercier, 2015       |                         |                                  |                             |                           |                       |                       |                             |                                              |                                                   |              |
| Nooijen, 2016       | Yes                     | Unclear                          | Yes                         | Yes                       | No                    | No                    | Yes                         | No                                           | Yes                                               | Medium       |
| Norrbrink, 2009     | Unclear                 | Unclear                          | No                          | Unclear                   | Yes                   | Yes                   | Yes                         | Yes                                          | Yes                                               | High         |
| Rintala, 2007       | Yes                     | Unclear                          | Yes                         | Unclear                   | Unclear, double-blind | Unclear, double-blind | Yes                         | No                                           | Yes                                               | Medium       |
| Siddall, 2006       | Yes                     | Yes                              | Yes                         | Unclear                   | Unclear, double-blind | Unclear, double-blind | Yes                         | No                                           | Yes                                               | Medium       |
| Yilmaz, 2014        | Unclear                 | Unclear                          | Unclear                     | Unclear                   | Yes                   | Unclear, double-blind | Unclear                     | No                                           | Yes                                               | High         |

**Table D-3. Risk of bias of observational studies**

| Author, Year                                        | Non-biased selection? | Acceptable overall loss to follow-up or differential loss to follow-up? | Outcomes pre-specified and defined? | Ascertainment techniques adequately described? | Non-biased and adequate ascertainment methods? | Statistical analysis of potential confounders? | Adequate duration of follow-up? | Overall risk of bias rating (High, Medium, Low) |
|-----------------------------------------------------|-----------------------|-------------------------------------------------------------------------|-------------------------------------|------------------------------------------------|------------------------------------------------|------------------------------------------------|---------------------------------|-------------------------------------------------|
| Ahoniemi, 2011                                      | Yes                   | Unclear                                                                 | Yes                                 | Yes                                            | Yes                                            | Unclear                                        | Yes                             | Medium                                          |
| Bradley, 1994                                       | No                    | No; Yes                                                                 | Yes                                 | Yes                                            | Yes                                            | No                                             | Yes                             | High                                            |
| Hartkopp, 1997                                      | Yes                   | Unclear                                                                 | Unclear                             | Yes                                            | Yes                                            | Unclear                                        | Yes                             | Medium                                          |
| Kalpajian, 2006                                     | Yes                   | Yes                                                                     | Yes                                 | Yes                                            | Yes                                            | Yes                                            | Yes                             | Medium                                          |
| Kemp, 1999<br>"depression among african american.." | Unclear               | Yes                                                                     | Yes                                 | Yes                                            | Yes                                            | Unclear                                        | Yes                             | High                                            |
| Kennedy, 2006<br>(psychosocial activity)            | Unclear               | Yes                                                                     | Yes                                 | Yes                                            | Yes                                            | No                                             | Yes                             | High                                            |
| Krause, 1999                                        |                       |                                                                         |                                     |                                                |                                                |                                                |                                 |                                                 |
| Krause, 2000<br>"health outcomes.."                 | Yes                   | Yes                                                                     | Yes                                 | Yes                                            | Yes                                            | Yes                                            | Yes                             | Medium                                          |
| Krause, 2009                                        | Yes                   | Yes                                                                     | Yes                                 | Yes                                            | Yes                                            | Unclear                                        | Yes                             | Medium                                          |
| Sweeney, 1982                                       | No                    | Yes                                                                     | Unclear                             | Yes                                            | Unclear                                        | No                                             | Yes                             | High                                            |
| Ullrich, 2014                                       | Yes                   | Yes                                                                     | Yes                                 | Yes                                            | Yes                                            | Unclear                                        | Yes                             | Medium                                          |

**Table D-4. Risk of bias of observational studies of risk factors**

| Author, Year                    | The study sample adequately represents the population of interest? | The study data available (i.e., participants not lost to followup) adequately represent the study sample? | The prognostic factor is measured in a similar way for all participants? | The outcome of interest is measured in a similar way for all participants? | Important potential confounding factors are appropriately accounted for? | The statistical analysis is appropriate, and all primary outcome are reported? | Risk of Bias |
|---------------------------------|--------------------------------------------------------------------|-----------------------------------------------------------------------------------------------------------|--------------------------------------------------------------------------|----------------------------------------------------------------------------|--------------------------------------------------------------------------|--------------------------------------------------------------------------------|--------------|
| Abdul-Sattar, 2014              | Yes                                                                | Yes                                                                                                       | Yes                                                                      | Yes                                                                        | Yes                                                                      | Yes                                                                            | Medium       |
| Alschuler, 2013                 | Yes                                                                | Yes                                                                                                       | Yes                                                                      | Yes                                                                        | Yes                                                                      | Yes                                                                            | Medium       |
| Arango-Lasprilla, 2011          | Yes                                                                | Yes                                                                                                       | Yes                                                                      | Yes                                                                        | Yes                                                                      | Yes                                                                            | Medium       |
| Bailey, 2012                    | Yes                                                                | Yes                                                                                                       | Yes                                                                      | Yes                                                                        | Yes                                                                      | Yes                                                                            | Medium       |
| Bannerjea, 2009                 | Yes                                                                | Yes                                                                                                       | Yes                                                                      | Yes                                                                        | Yes                                                                      | Yes                                                                            | Medium       |
| Binks, 1997                     | Unclear                                                            | Unclear                                                                                                   | Unclear                                                                  | Unclear                                                                    | Unclear                                                                  | Unclear                                                                        | High         |
| Bombardier, 2016                | Yes                                                                | Yes                                                                                                       | Yes                                                                      | Yes                                                                        | Yes                                                                      | Yes                                                                            | Medium       |
| Burns, 2009                     | Yes                                                                | Unclear                                                                                                   | Yes                                                                      | Yes                                                                        | Yes                                                                      | Yes                                                                            | Medium       |
| Burns, 2010                     |                                                                    |                                                                                                           |                                                                          |                                                                            |                                                                          |                                                                                |              |
| Cao, 2014<br>(Rehab Psychology) | Unclear                                                            | Yes                                                                                                       | Yes                                                                      | Yes                                                                        | Yes                                                                      | Yes                                                                            | Medium       |
| Cao 2014b<br>(Archives of ...)  | Yes                                                                | Yes                                                                                                       | Yes                                                                      | Yes                                                                        | Yes                                                                      | Yes                                                                            | Medium       |
| Catalano, 2011                  | Unclear                                                            | Unclear                                                                                                   | Yes                                                                      | Yes                                                                        | Yes                                                                      | Unclear                                                                        | Medium       |
| Charlifue, 1991                 | Yes                                                                | Yes                                                                                                       | Yes                                                                      | Yes                                                                        | Yes                                                                      | Yes                                                                            | Medium       |
| Cuff, 2014                      | Yes                                                                | Yes                                                                                                       | Yes                                                                      | Yes                                                                        | Yes                                                                      | Yes                                                                            | Medium       |
| Cragg, 2015                     | Unclear                                                            | Unclear                                                                                                   | Yes                                                                      | Yes                                                                        | Yes                                                                      | Yes                                                                            | High         |
| Craig, 2015                     | Unclear                                                            | Unclear                                                                                                   | Yes                                                                      | Yes                                                                        | Yes                                                                      | Yes                                                                            | High         |
| Danner, 2000                    | Yes (VA)                                                           | Yes                                                                                                       | Yes                                                                      | Yes                                                                        | Yes                                                                      | Yes                                                                            | Medium       |
| Daverat, 1995                   | Yes                                                                | Yes                                                                                                       | Yes                                                                      | Yes                                                                        | Yes                                                                      | Yes                                                                            | Medium       |
| Dodd, 2015                      | Yes                                                                | Yes                                                                                                       | Yes                                                                      | Yes                                                                        | Yes                                                                      | Yes                                                                            | Medium       |
| Dryden, 2005                    | Yes                                                                | Yes                                                                                                       | Yes                                                                      | Yes                                                                        | Yes                                                                      | Yes                                                                            | Medium       |
| Fann, 2013                      | Yes                                                                | Yes                                                                                                       | Yes                                                                      | Yes                                                                        | Yes                                                                      | Yes                                                                            | Medium       |
| Geyh, 2013                      | Yes                                                                | Yes                                                                                                       | Yes                                                                      | Yes                                                                        | Yes                                                                      | Yes                                                                            | Medium       |
| Gioia, 2006                     | Yes                                                                | Yes                                                                                                       | Yes                                                                      | Yes                                                                        | Yes                                                                      | Yes                                                                            | Medium       |
| Hartoonian, 2014                | Yes                                                                | Yes                                                                                                       | Yes                                                                      | Yes                                                                        | Yes                                                                      | Yes                                                                            | Medium       |

*Continued*

Table D-4. Continued

| Author, Year                                      | The study sample adequately represents the population of interest? | The study data available (i.e., participants not lost to followup) adequately represent the study sample? | The prognostic factor is measured in a similar way for all participants? | The outcome of interest is measured in a similar way for all participants? | Important potential confounding factors are appropriately accounted for? | The statistical analysis is appropriate, and all primary outcome are reported? | Risk of Bias |
|---------------------------------------------------|--------------------------------------------------------------------|-----------------------------------------------------------------------------------------------------------|--------------------------------------------------------------------------|----------------------------------------------------------------------------|--------------------------------------------------------------------------|--------------------------------------------------------------------------------|--------------|
| Hassanpour, 2012                                  | Yes                                                                | Yes                                                                                                       | Yes                                                                      | Yes                                                                        | Yes                                                                      | Yes                                                                            | Medium       |
| Hatcher, 2009                                     | Unclear                                                            | Yes                                                                                                       | Yes                                                                      | Yes                                                                        | Yes                                                                      | Yes                                                                            | High         |
| Hoffman, 2011                                     | Yes                                                                | Yes                                                                                                       | Yes                                                                      | Yes                                                                        | Yes                                                                      | Yes                                                                            | Medium       |
| Holicky, 1999                                     | Yes                                                                | Yes                                                                                                       | Yes                                                                      | Yes                                                                        | Yes                                                                      | Yes                                                                            | Medium       |
| Huang, 2014                                       | Yes                                                                | Yes                                                                                                       | Yes                                                                      | Yes                                                                        | Yes                                                                      | Yes                                                                            | Medium       |
| Hwang, 2014                                       | Yes                                                                | Yes                                                                                                       | Yes                                                                      | Yes                                                                        | Yes                                                                      | Yes                                                                            | Medium       |
| January, 2014<br>(Archives of Phys Med and Rehab) | Yes                                                                | Yes                                                                                                       | Yes                                                                      | Yes                                                                        | Yes                                                                      | Yes                                                                            | Medium       |
| January, 2015<br>(Rehabilitation Psych)           | Yes                                                                | Yes                                                                                                       | Yes                                                                      | Yes                                                                        | Yes                                                                      | Yes                                                                            | Medium       |
| Jensen, 2014                                      | Yes                                                                | Yes                                                                                                       | Yes                                                                      | Yes                                                                        | Yes                                                                      | Yes                                                                            | Medium       |
| Kalpakjian, 2011                                  | Yes                                                                | Yes                                                                                                       | Yes                                                                      | Yes                                                                        | Yes                                                                      | Yes                                                                            | Medium       |
| Kemp, 2014                                        | Yes                                                                | Yes                                                                                                       | Yes                                                                      | Yes                                                                        | Yes                                                                      | Yes                                                                            | Medium       |
| Krause, 2010<br>(arch phys med rehab)             | Yes                                                                | Yes                                                                                                       | Yes                                                                      | Yes                                                                        | Yes                                                                      | Yes                                                                            | Medium       |
| LaVela, 2012                                      | Unclear                                                            | Unclear                                                                                                   | Yes                                                                      | Yes                                                                        | Yes                                                                      | Yes                                                                            | High         |
| Lidal, 2013                                       | Unclear                                                            | Unclear                                                                                                   | Yes                                                                      | Yes                                                                        | Yes                                                                      | Yes                                                                            | High         |
| Lin, 2009                                         | Unclear                                                            | Unclear                                                                                                   | Yes                                                                      | Yes                                                                        | Yes                                                                      | Yes                                                                            | High         |
| Liu, 2010                                         | Unclear                                                            | Yes                                                                                                       | Yes                                                                      | Yes                                                                        | Yes                                                                      | Yes                                                                            | Medium       |
| Lundqvist, 1997                                   | Unclear                                                            | Yes                                                                                                       | Yes                                                                      | Yes                                                                        | Yes                                                                      | Yes                                                                            | Medium       |
| Martz, 2005<br>(rehab psych)                      | Unclear                                                            | Yes                                                                                                       | Yes                                                                      | Yes                                                                        | Yes                                                                      | Yes                                                                            | Medium       |
| McCullumsmith, 2015                               | Yes                                                                | Yes                                                                                                       | Yes                                                                      | Yes                                                                        | Yes                                                                      | Yes                                                                            | Medium       |
| Migliorini, 2008                                  | Yes                                                                | Yes                                                                                                       | Yes                                                                      | Yes                                                                        | Yes                                                                      | Yes                                                                            | Medium       |
| Migliorini, 2009                                  | Yes                                                                | Yes                                                                                                       | Yes                                                                      | Yes                                                                        | Yes                                                                      | Yes                                                                            | Medium       |
| Monin, 2014                                       | Yes                                                                | Yes                                                                                                       | Yes                                                                      | Yes                                                                        | Yes                                                                      | Yes                                                                            | Medium       |
| Muller, 2015                                      | Yes                                                                | Yes                                                                                                       | Yes                                                                      | Yes                                                                        | Yes                                                                      | Yes                                                                            | Medium       |
| Nam, 2013                                         | Yes                                                                | Yes                                                                                                       | Yes                                                                      | Yes                                                                        | Yes                                                                      | Yes                                                                            | Medium       |
| Nelson, 2010                                      | Yes                                                                | Yes                                                                                                       | Yes                                                                      | Yes                                                                        | Yes                                                                      | Yes                                                                            | Medium       |
| Nielsen, 2003                                     | Yes                                                                | Yes                                                                                                       | Yes                                                                      | Yes                                                                        | Yes                                                                      | Yes                                                                            | High         |
| O'Shea, 2014                                      | Yes                                                                | Yes                                                                                                       | Yes                                                                      | Yes                                                                        | Yes                                                                      | Yes                                                                            | Medium       |
| Oh, 2006                                          | Yes                                                                | Yes                                                                                                       | Yes                                                                      | Yes                                                                        | Yes                                                                      | Yes                                                                            | Medium       |
| Pakpour, 2016                                     | Yes                                                                | Yes                                                                                                       | Yes                                                                      | Yes                                                                        | Yes                                                                      | Yes                                                                            | Medium       |
| Peter, 2015                                       | Yes                                                                | Yes                                                                                                       | Yes                                                                      | Yes                                                                        | Yes                                                                      | Yes                                                                            | Medium       |
| Riggins, 2011                                     | Yes                                                                | Yes                                                                                                       | Yes                                                                      | Yes                                                                        | Yes                                                                      | Yes                                                                            | Medium       |
| Rintala, 2005                                     | Yes                                                                | Yes                                                                                                       | Yes                                                                      | Yes                                                                        | Yes                                                                      | Yes                                                                            | Medium       |
| Saunders, 2011                                    | Yes                                                                | Unclear                                                                                                   | Yes                                                                      | Yes                                                                        | Yes                                                                      | Yes                                                                            | Medium       |
| Saunders, 2013                                    |                                                                    |                                                                                                           |                                                                          |                                                                            |                                                                          |                                                                                |              |
| Saunders, 2012                                    | Yes                                                                | Yes                                                                                                       | Yes                                                                      | Yes                                                                        | Yes                                                                      | Yes                                                                            | Medium       |
| Schandler, 1995                                   | Yes                                                                | Yes                                                                                                       | Yes                                                                      | Yes                                                                        | Yes                                                                      | Yes                                                                            | Medium       |
| Schonenberg, 2014                                 | Yes                                                                | Yes                                                                                                       | Yes                                                                      | Yes                                                                        | Yes                                                                      | Yes                                                                            | Medium       |
| Tasiemski, 2011                                   | Yes                                                                | Yes                                                                                                       | Yes                                                                      | Yes                                                                        | Yes                                                                      | Yes                                                                            | Medium       |
| Tate, 1994                                        | Yes                                                                | Yes                                                                                                       | Yes                                                                      | Yes                                                                        | Yes                                                                      | Yes                                                                            | Medium       |
| Tate, 2004                                        | Yes                                                                | Yes                                                                                                       | Yes                                                                      | Yes                                                                        | Yes                                                                      | Yes                                                                            | Medium       |
| Tsai, 2014                                        | Yes                                                                | Yes                                                                                                       | Yes                                                                      | Yes                                                                        | Yes                                                                      | Yes                                                                            | Medium       |
| Ullrich, 2013<br>(rehabilitation psychology)      | Yes                                                                | Yes                                                                                                       | Yes                                                                      | Yes                                                                        | Yes                                                                      | Yes                                                                            | Medium       |
| Ullrich, 2014                                     | Yes                                                                | Yes                                                                                                       | Yes                                                                      | Yes                                                                        | Yes                                                                      | Yes                                                                            | High         |
| Williams, 2014                                    | Yes                                                                | Yes                                                                                                       | Yes                                                                      | Yes                                                                        | Yes                                                                      | Yes                                                                            | Medium       |
